# Supplementary material
Source: publisher figshare collection journal article supplement (https://gsajournals.figshare.com/articles/dataset/_/8266763)

# Cell surface proteins: per gene mean-subtracted normalized transformed counts

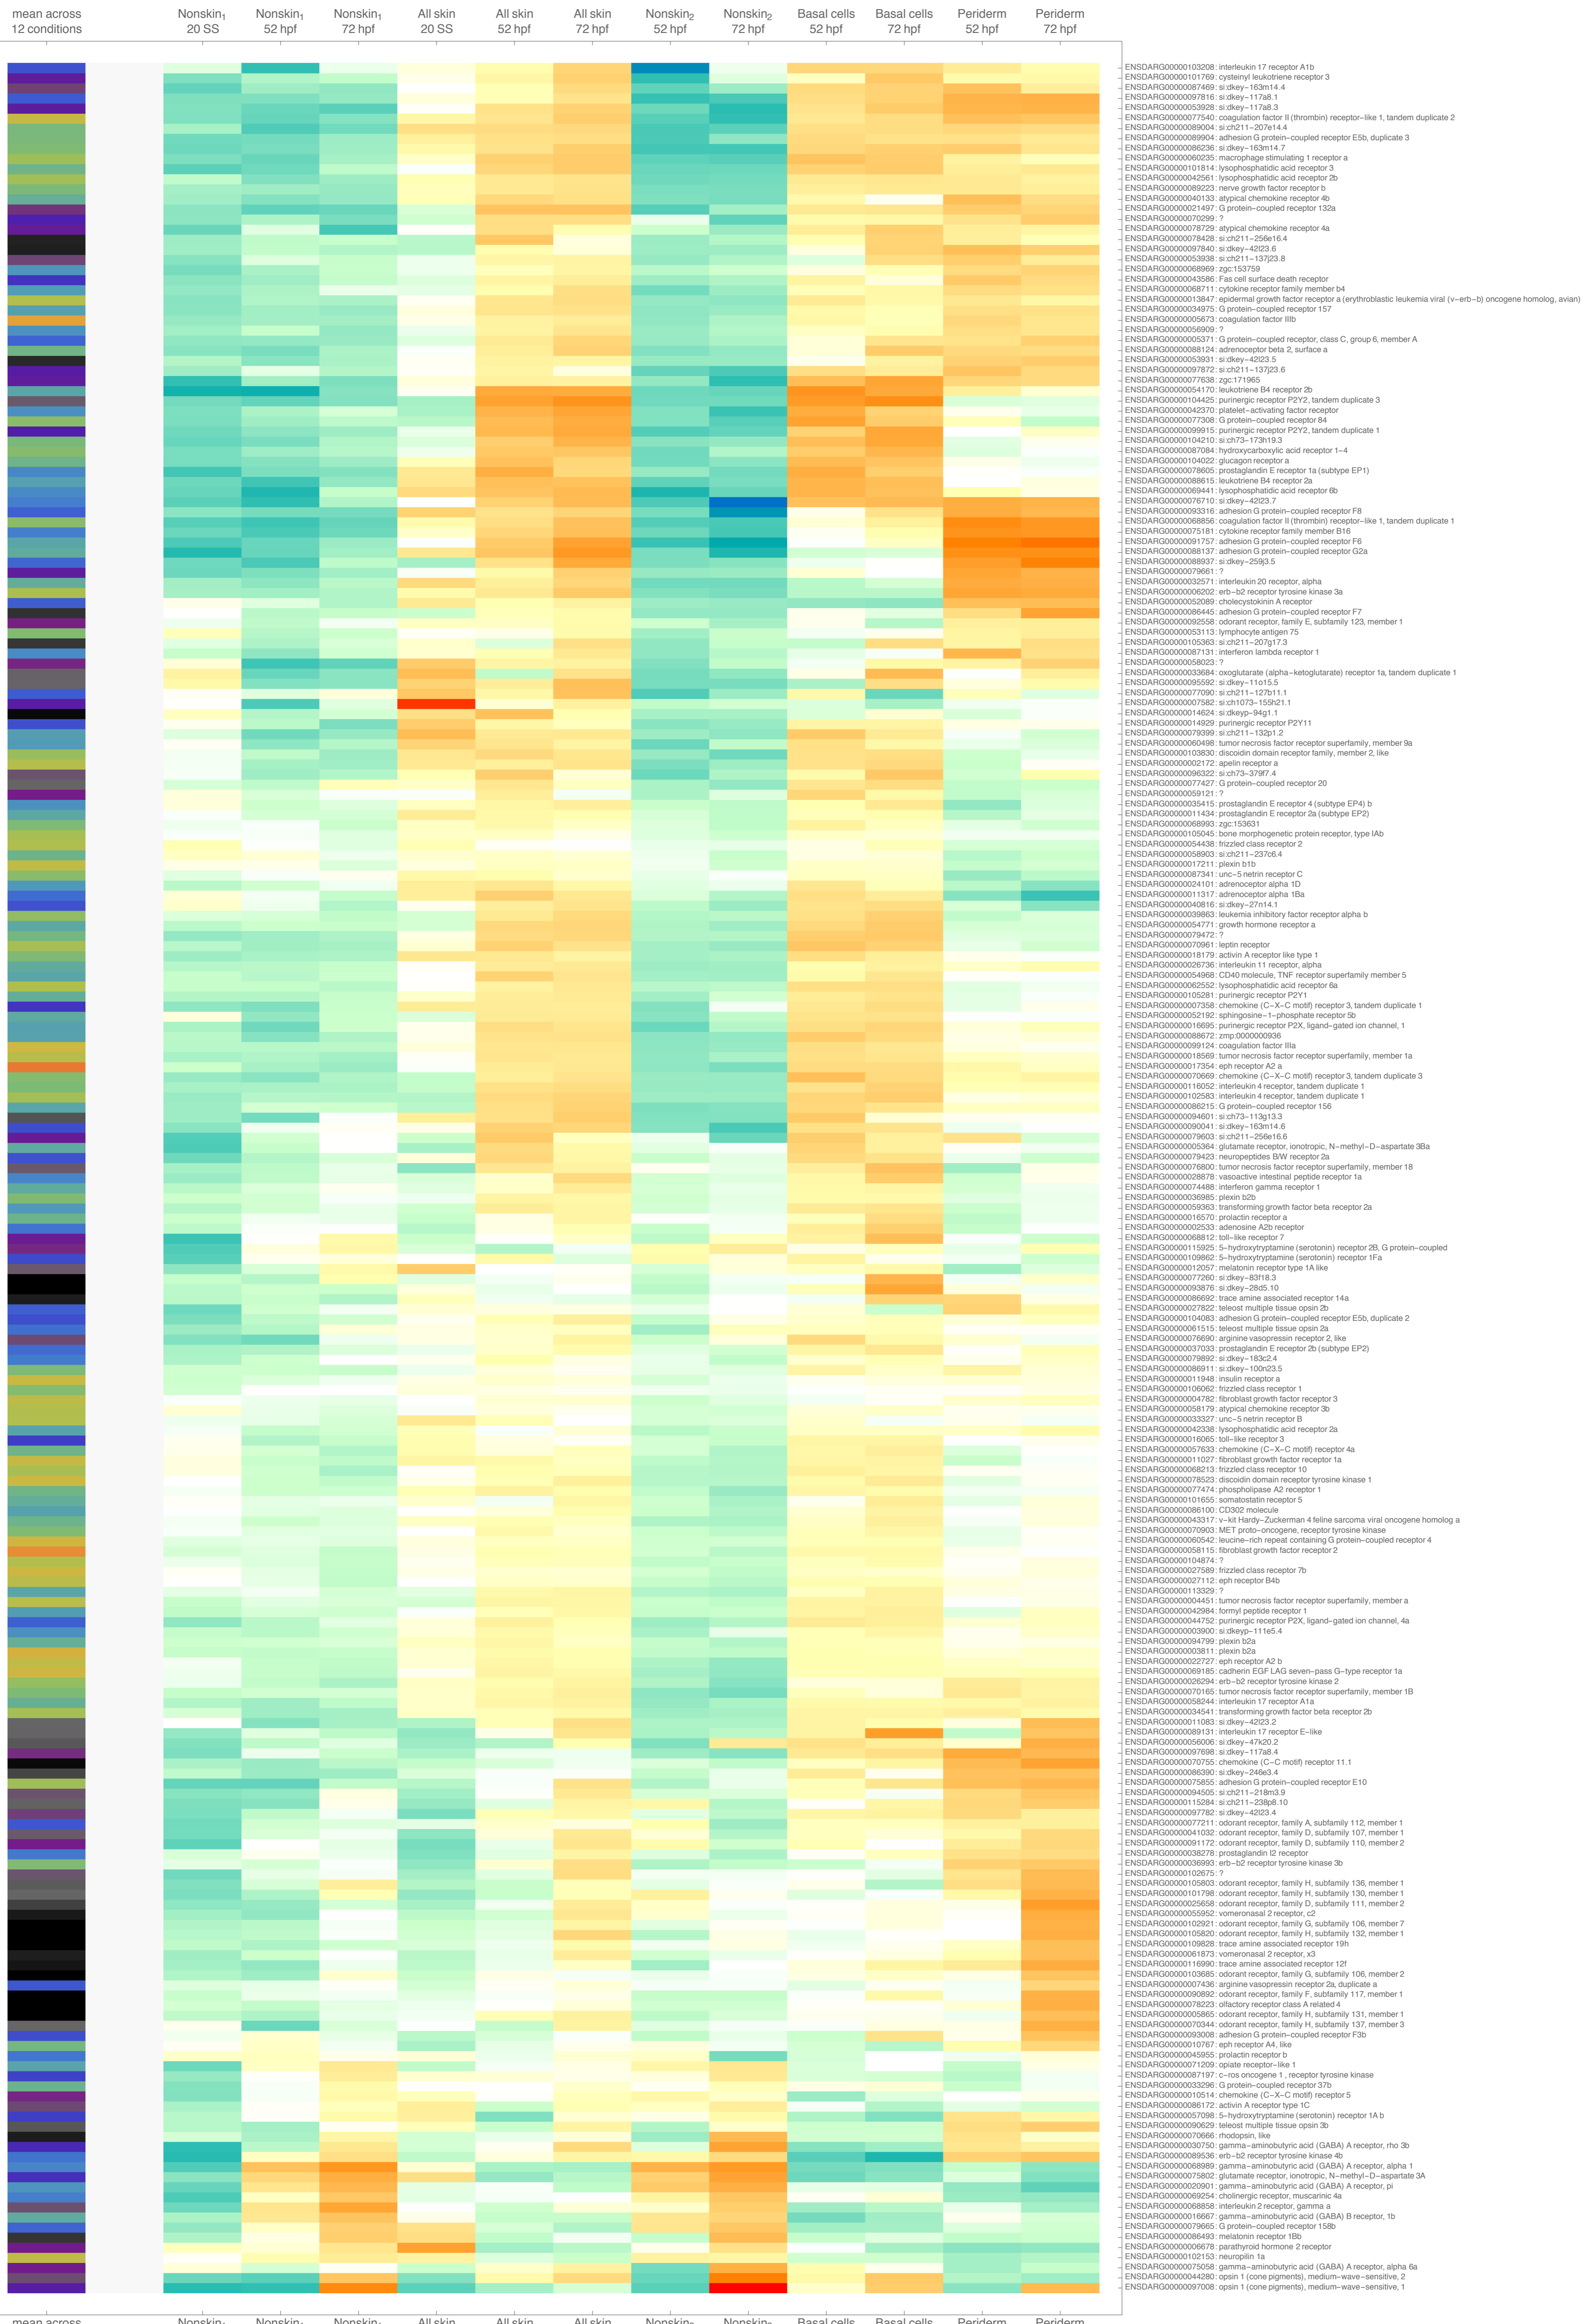



# Transcription factors: per-gene mean-subtracted normalized transformed counts

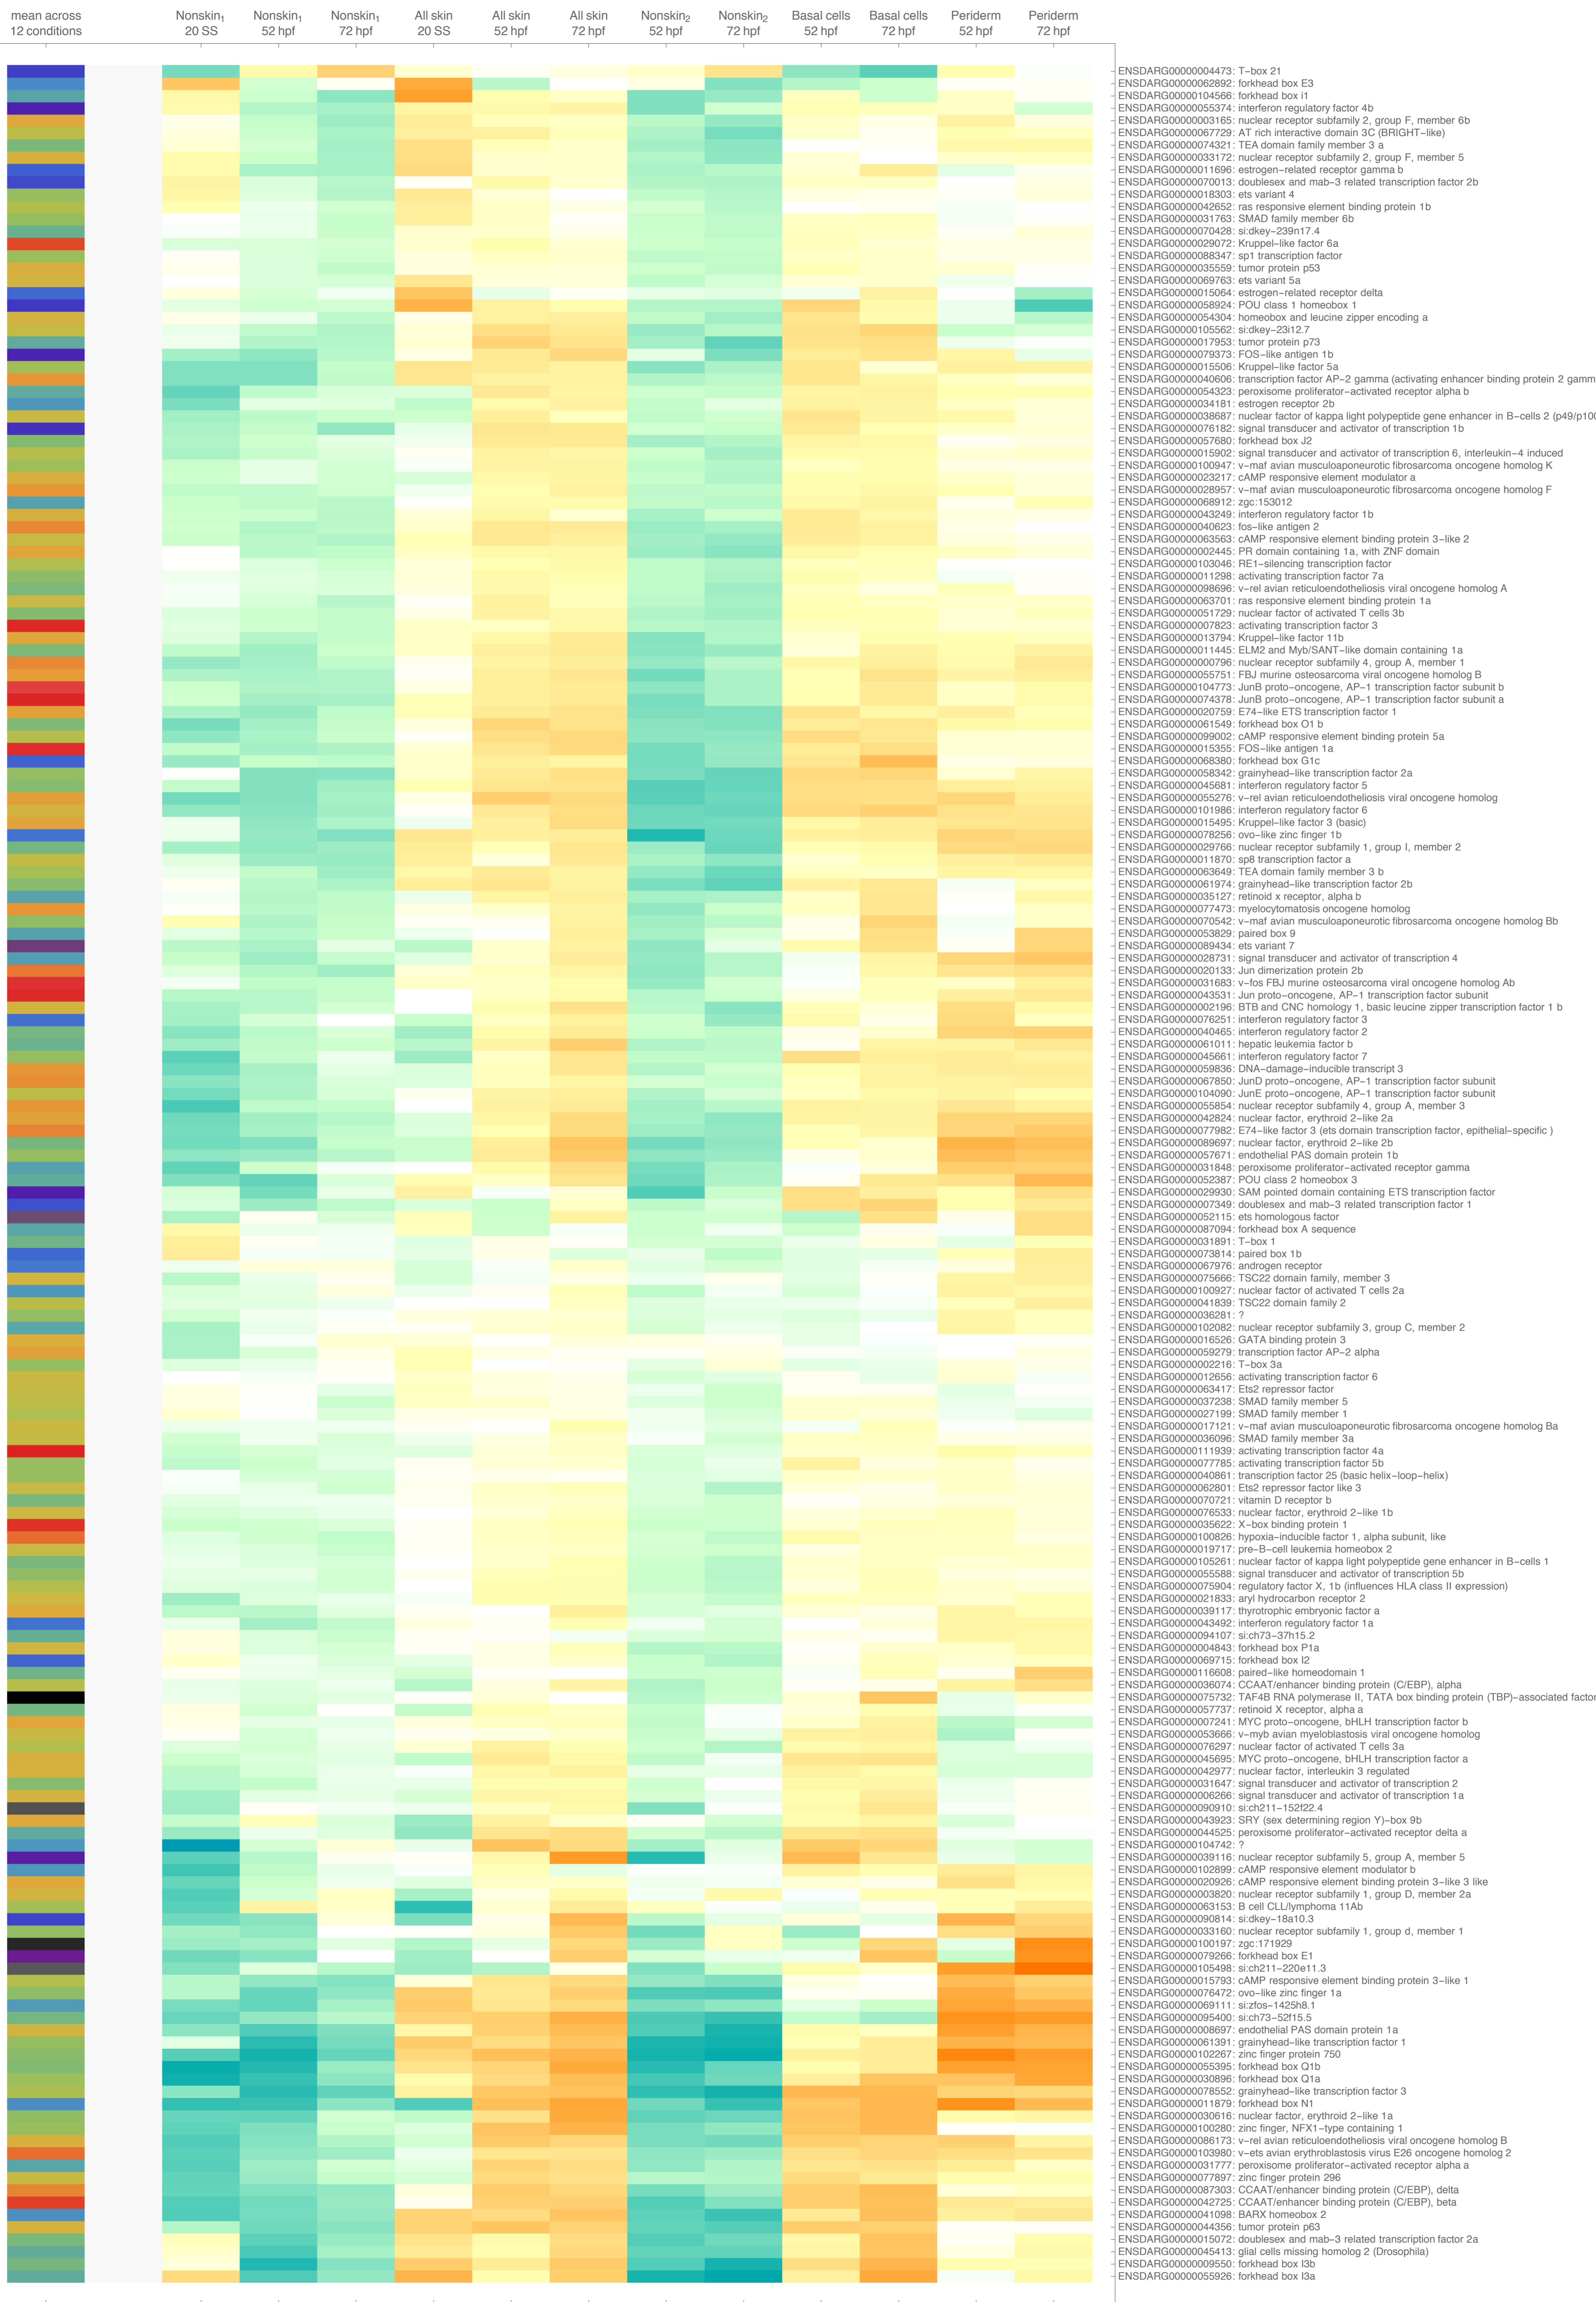



# Actin binding proteins: per-gene mean-subtracted normalized transformed counts

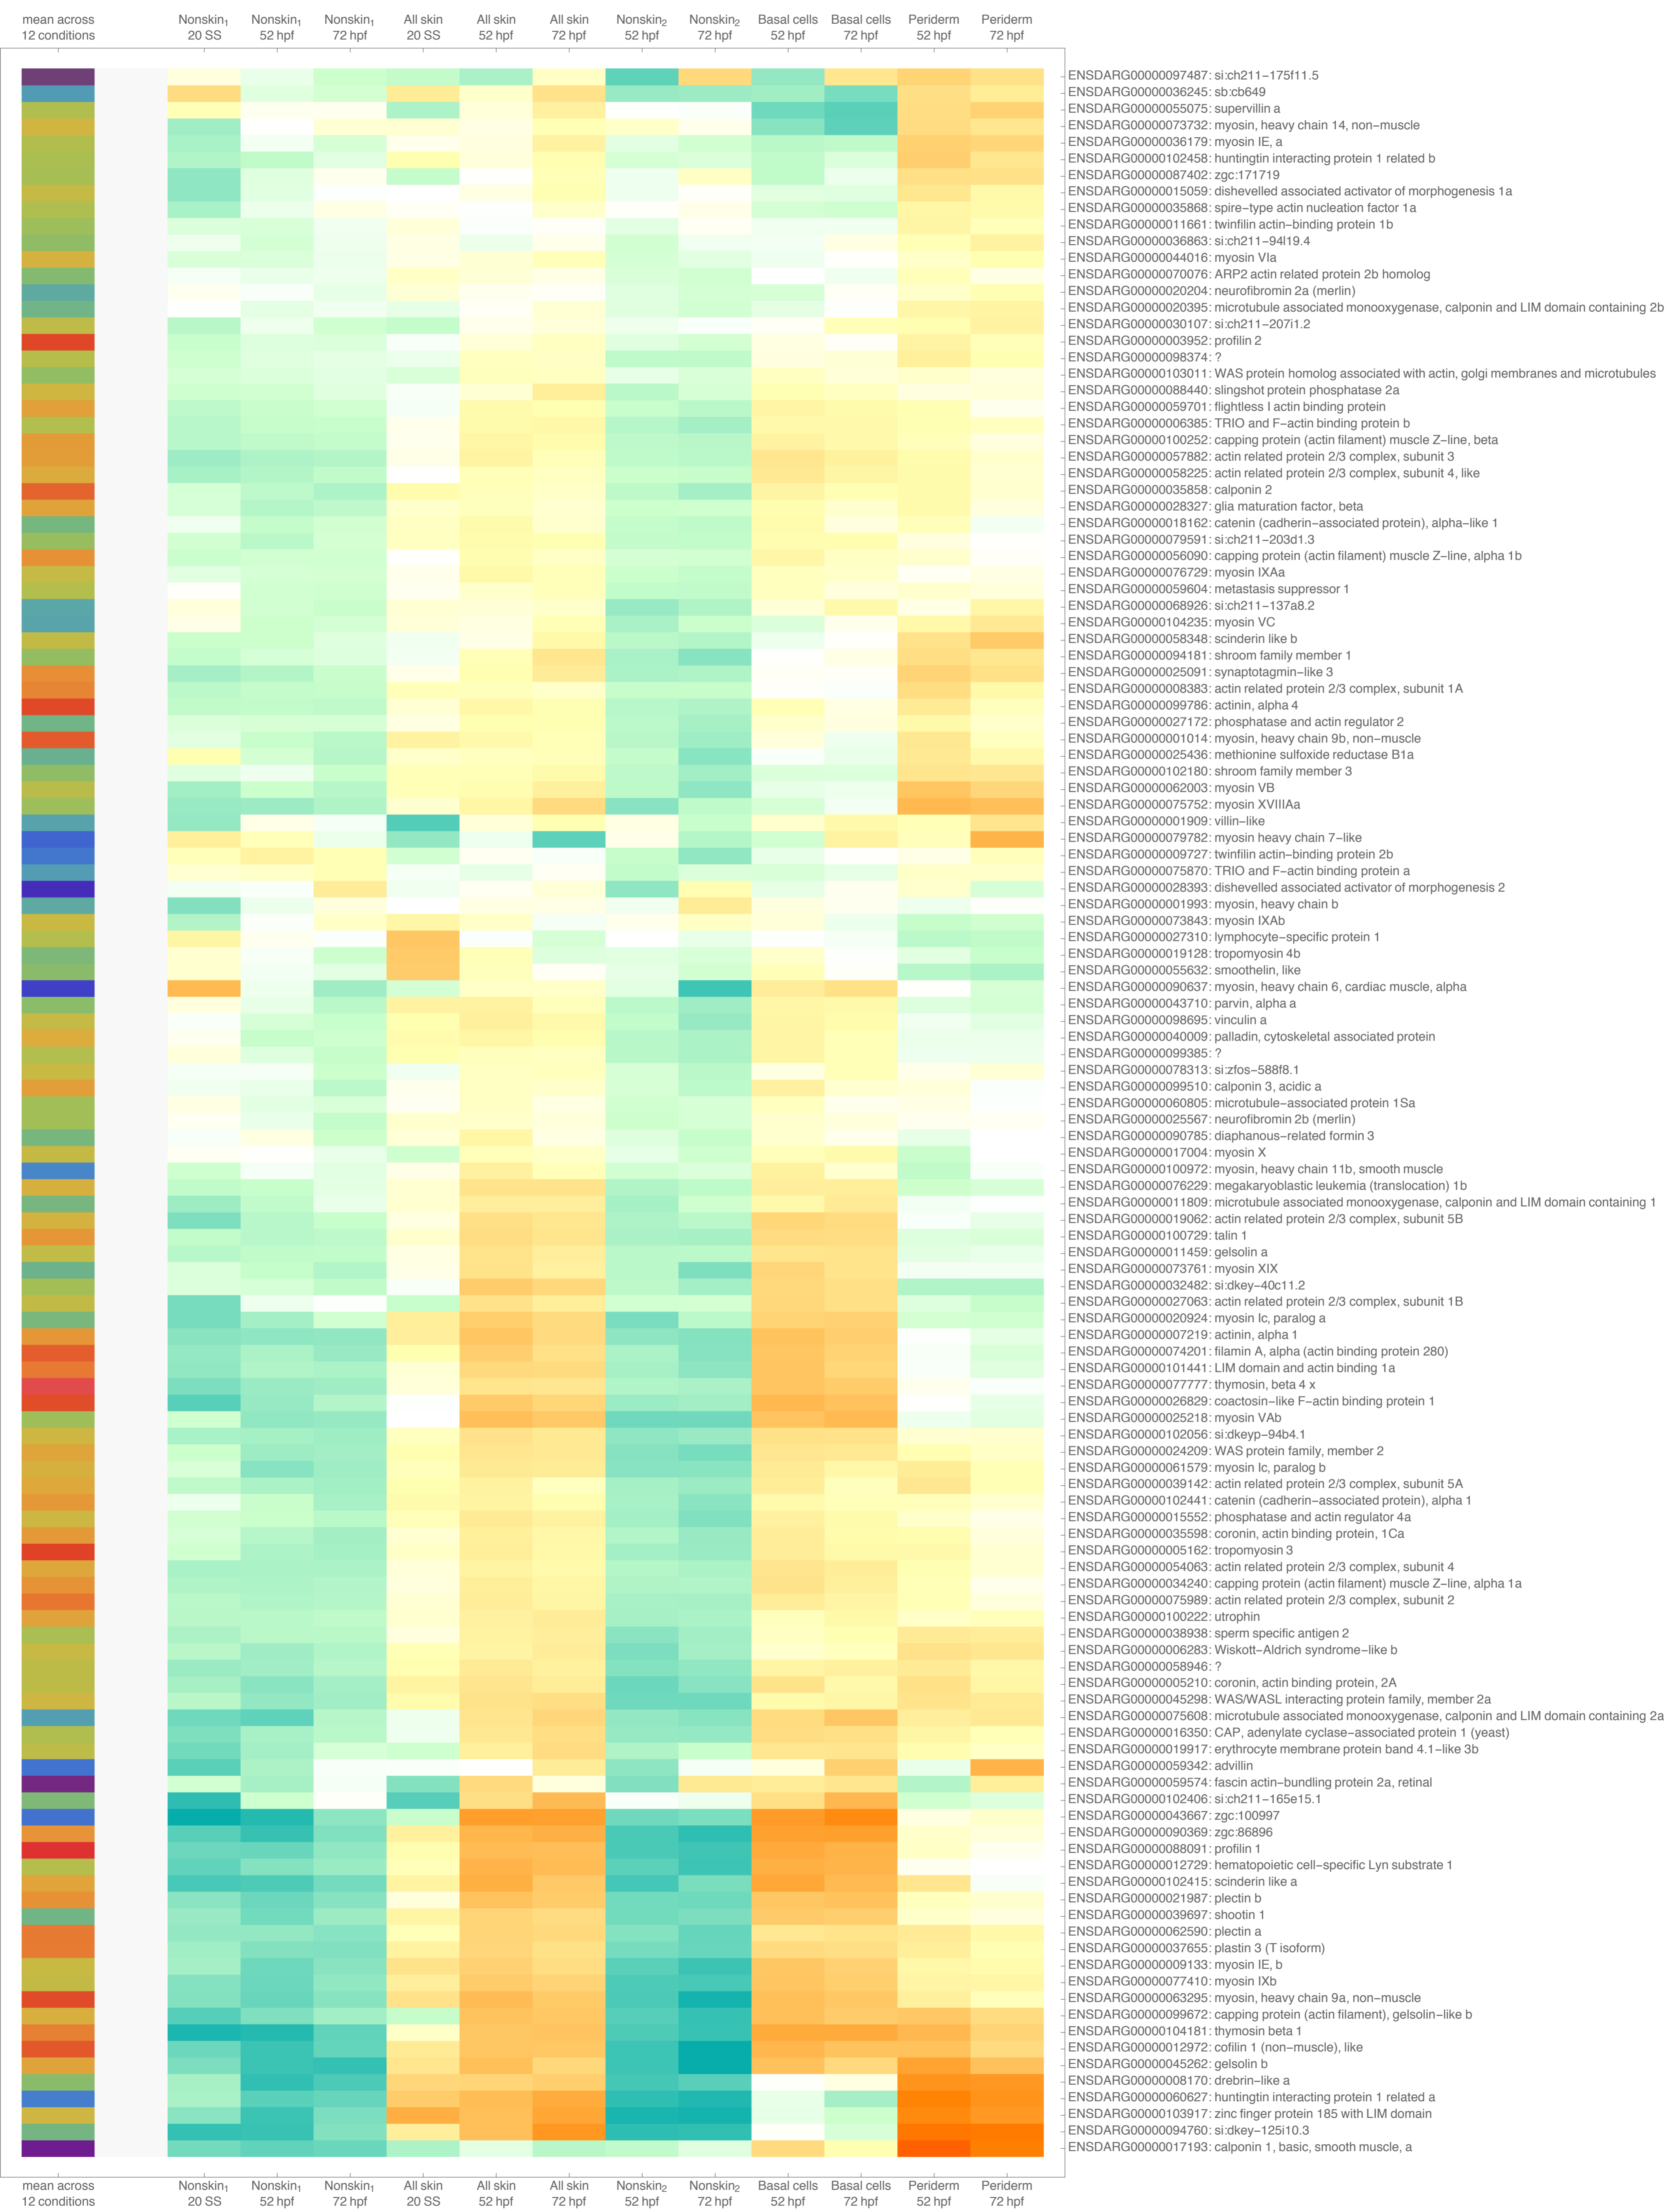

Supplement: Supplementary file 1 [file 1]
