# Supplementary material
Source: publisher figshare collection journal article supplement (https://gsajournals.figshare.com/articles/dataset/_/8266763)
Supplement: Supplementary file 2 [file 1]

Protein

(I) krtt1c1

Length 547 amino acids

Protein family membership

 Keratin, type I ([IPR002957](#))

Homologous superfamilies none

Domains and repeats

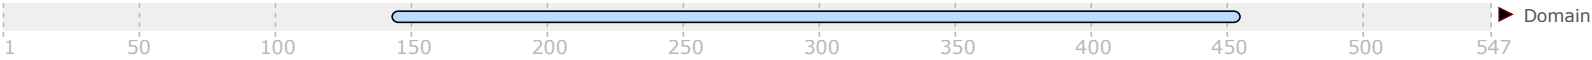

Detailed signature matches

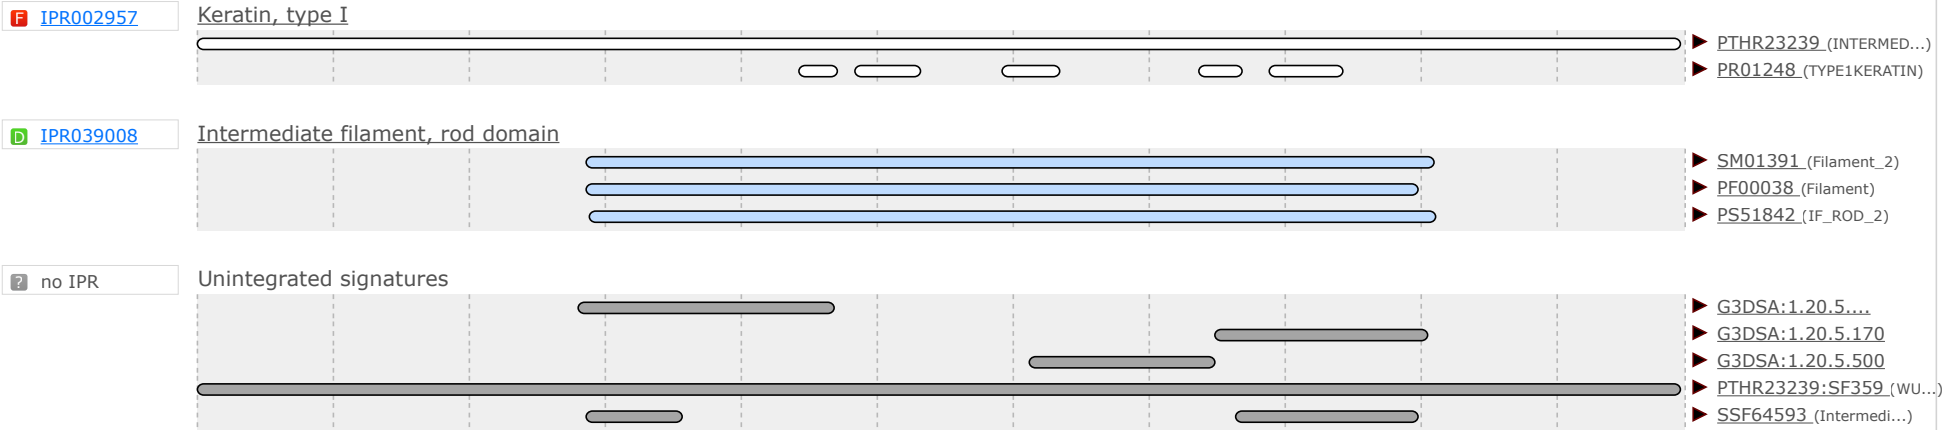

Other features

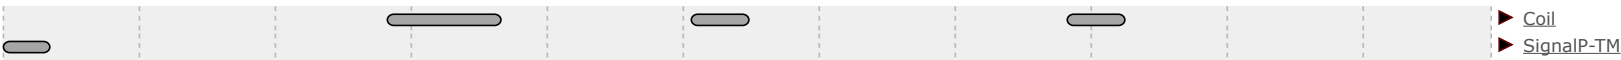

GO Term prediction

Biological process

None predicted.

Molecular function

[GO:0005198](#) structural molecule activity

Cellular component

None predicted.

Protein

(I) krt1-c5

Length 431 amino acids

Protein family membership

 [Keratin, type I \(IPR002957\)](#)

Homologous superfamilies none

Domains and repeats

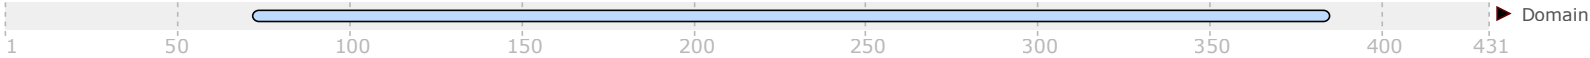

Detailed signature matches

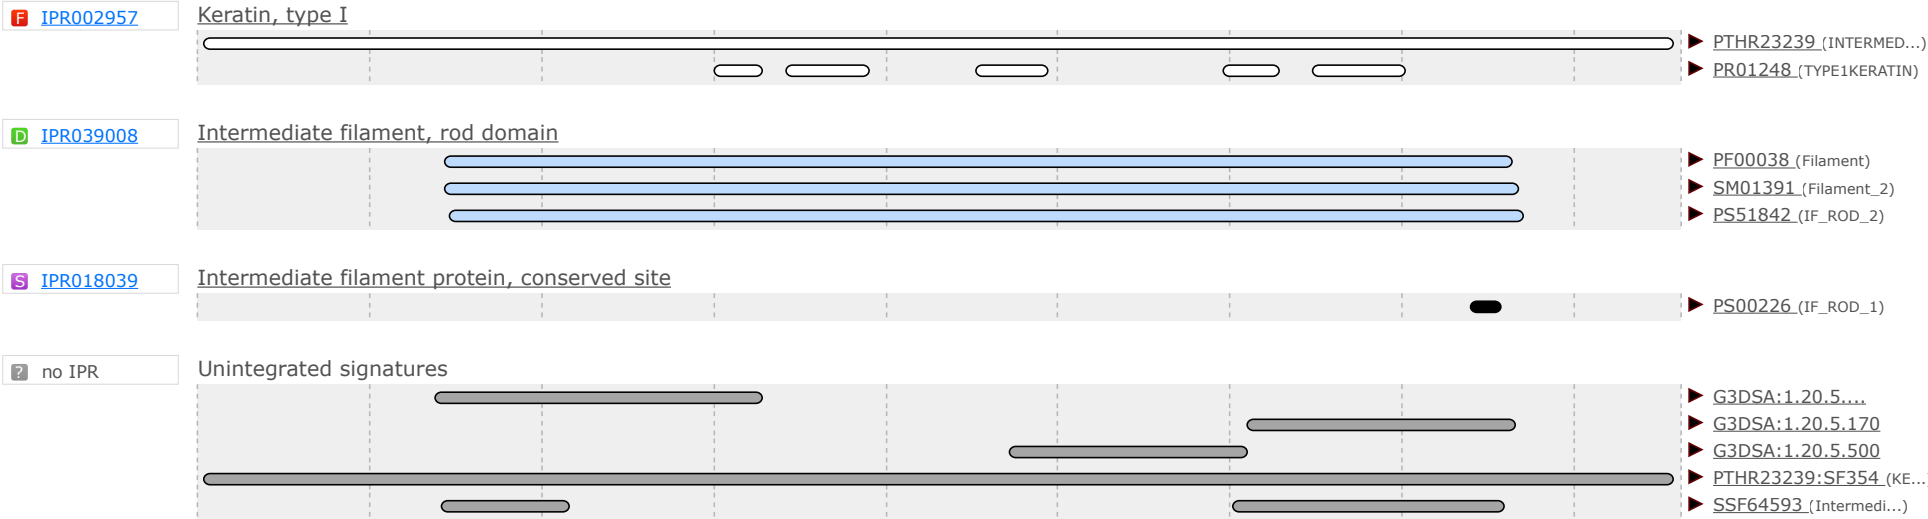

Other features

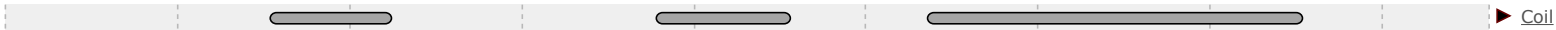

GO Term prediction

Biological process

None predicted.

Molecular function

[GO:0005198](#) structural molecule activity

Cellular component

None predicted.

Protein

(I) krtt1c10

Length 428 amino acids

Protein family membership

 [Keratin, type I \(IPR002957\)](#)

Homologous superfamilies none

Domains and repeats

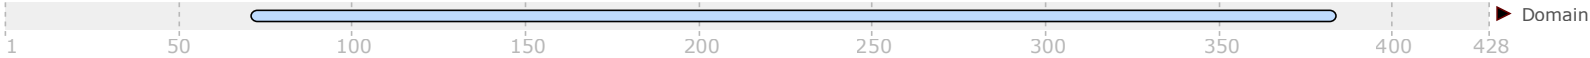

Detailed signature matches

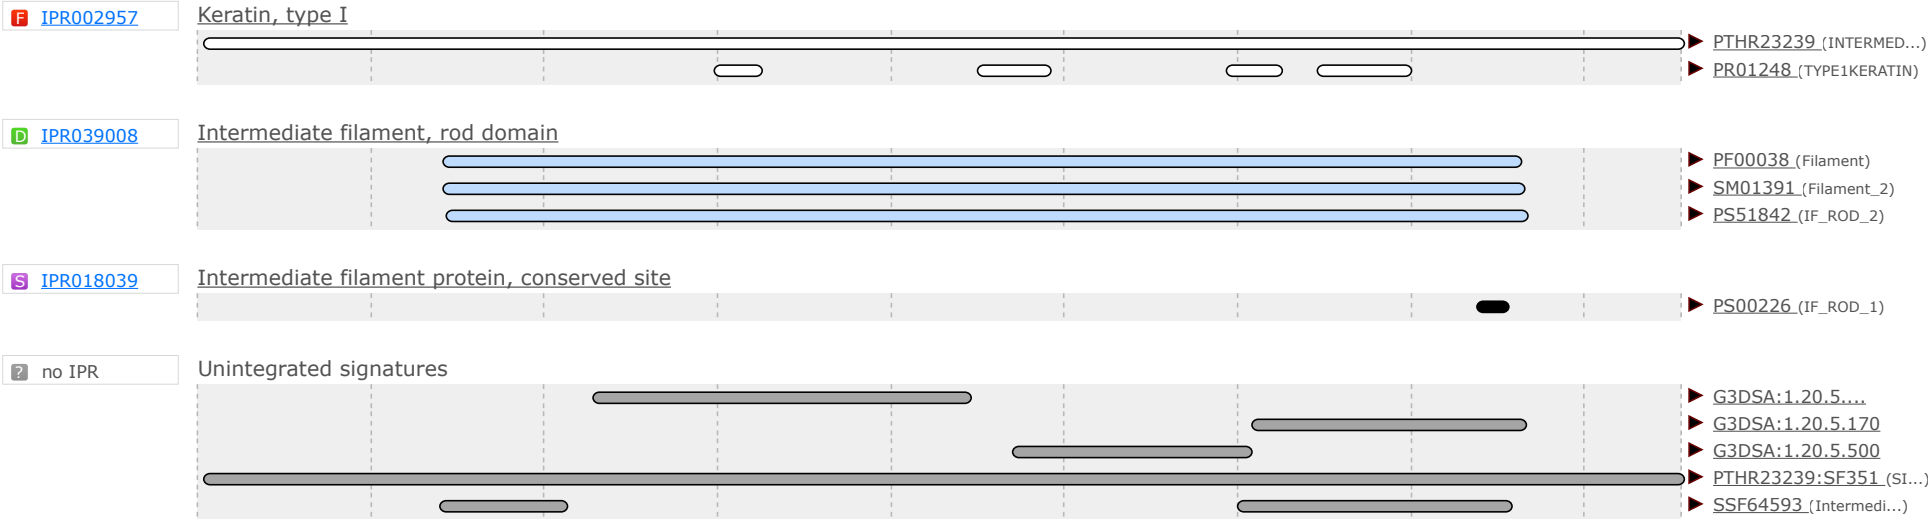

Other features

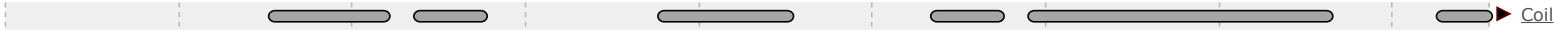

GO Term prediction

| Biological process | Molecular function                                      | Cellular component |
|--------------------|---------------------------------------------------------|--------------------|
| None predicted.    | <a href="#">GO:0005198</a> structural molecule activity | None predicted.    |

(I) krtt1c9

Length 501 amino acids

Protein family membership

 Keratin, type I ([IPR002957](#))

Homologous superfamilies none

Domains and repeats

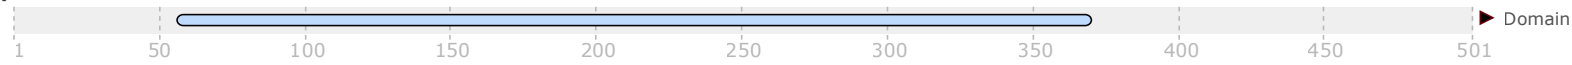

Detailed signature matches

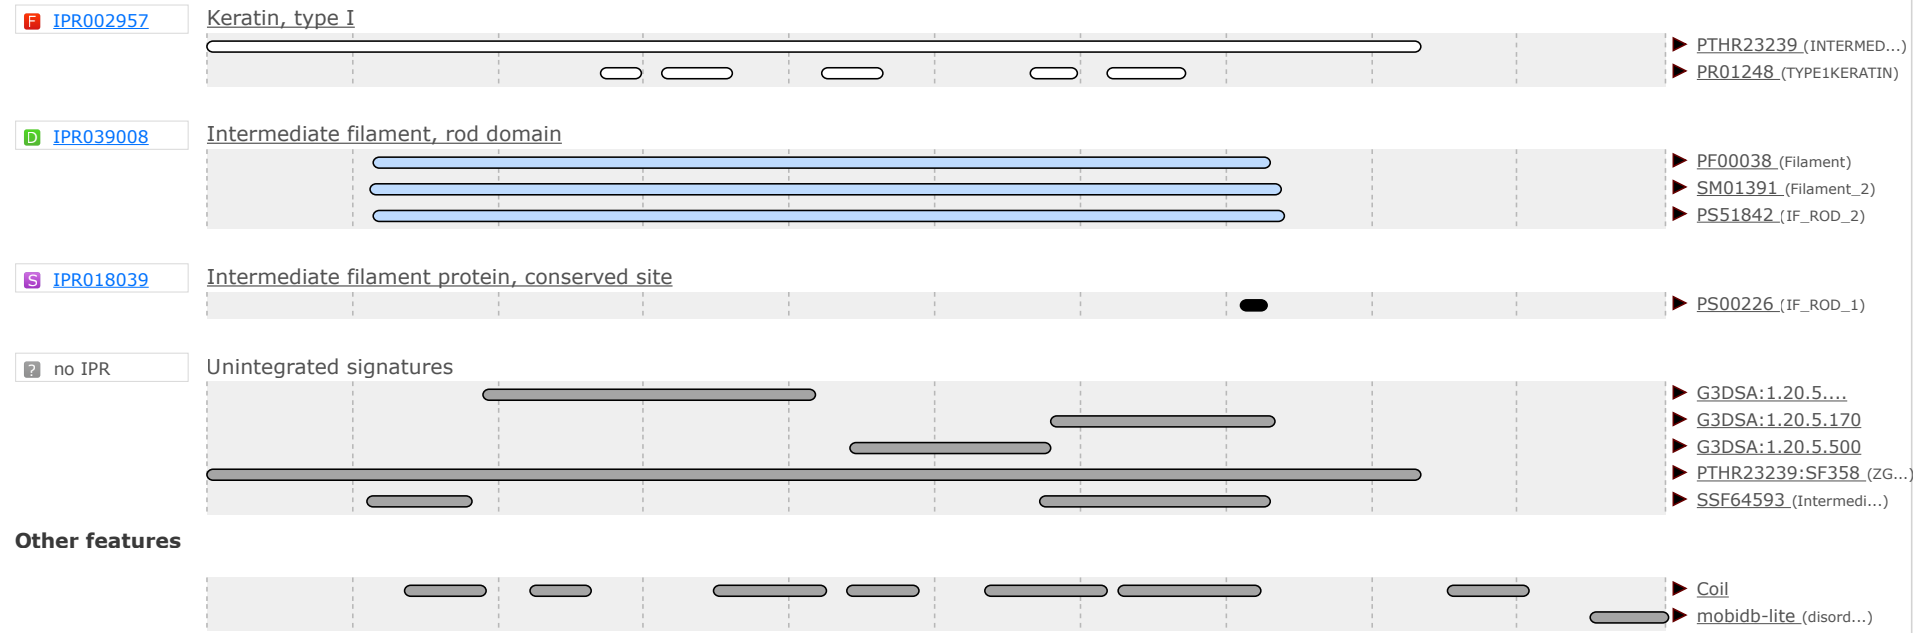

Other features

GO Term prediction

| Biological process | Molecular function                                      | Cellular component |
|--------------------|---------------------------------------------------------|--------------------|
| None predicted.    | <a href="#">GO:0005198</a> structural molecule activity | None predicted.    |

(I) krt18a.2

Length 423 amino acids

Protein family membership

 Keratin, type I ([IPR002957](#))

Homologous superfamilies none

Domains and repeats

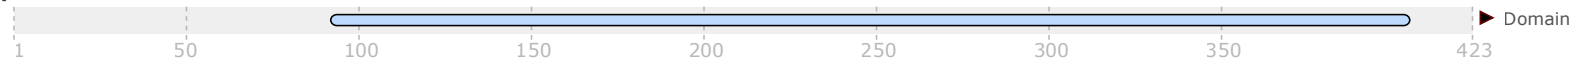

Detailed signature matches

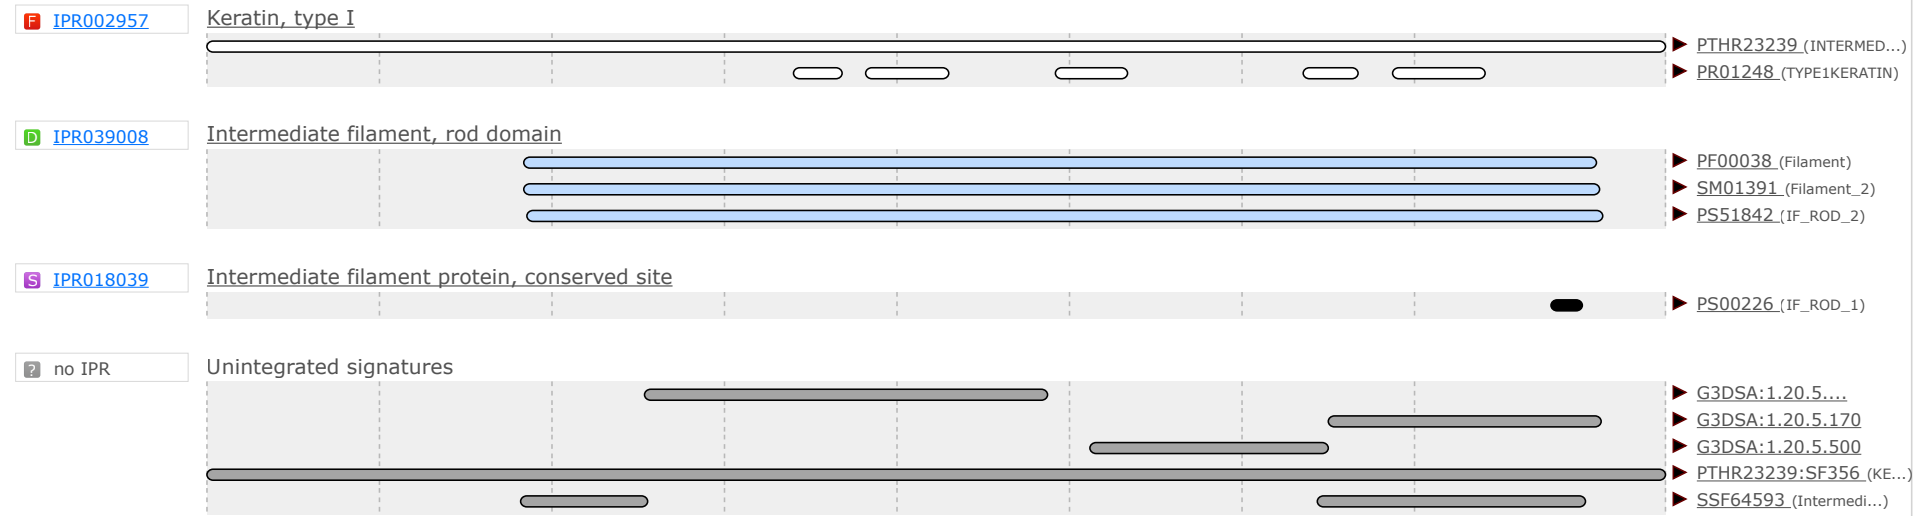

Other features

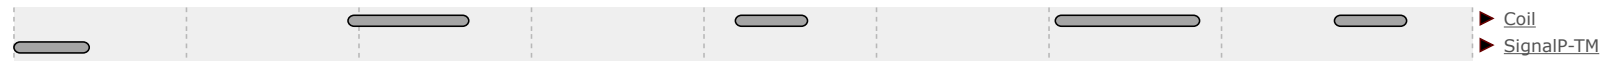

GO Term prediction

| Biological process | Molecular function                                      | Cellular component |
|--------------------|---------------------------------------------------------|--------------------|
| None predicted.    | <a href="#">GO:0005198</a> structural molecule activity | None predicted.    |

Protein

(I) krt18a.1

Length 431 amino acids

Protein family membership

 [Keratin, type I \(IPR002957\)](#)

Homologous superfamilies none

Domains and repeats

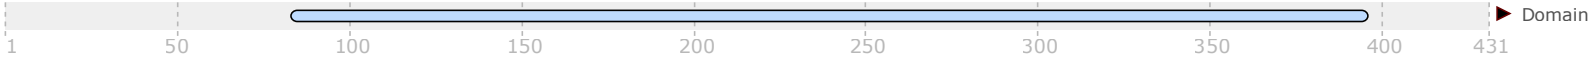

Detailed signature matches

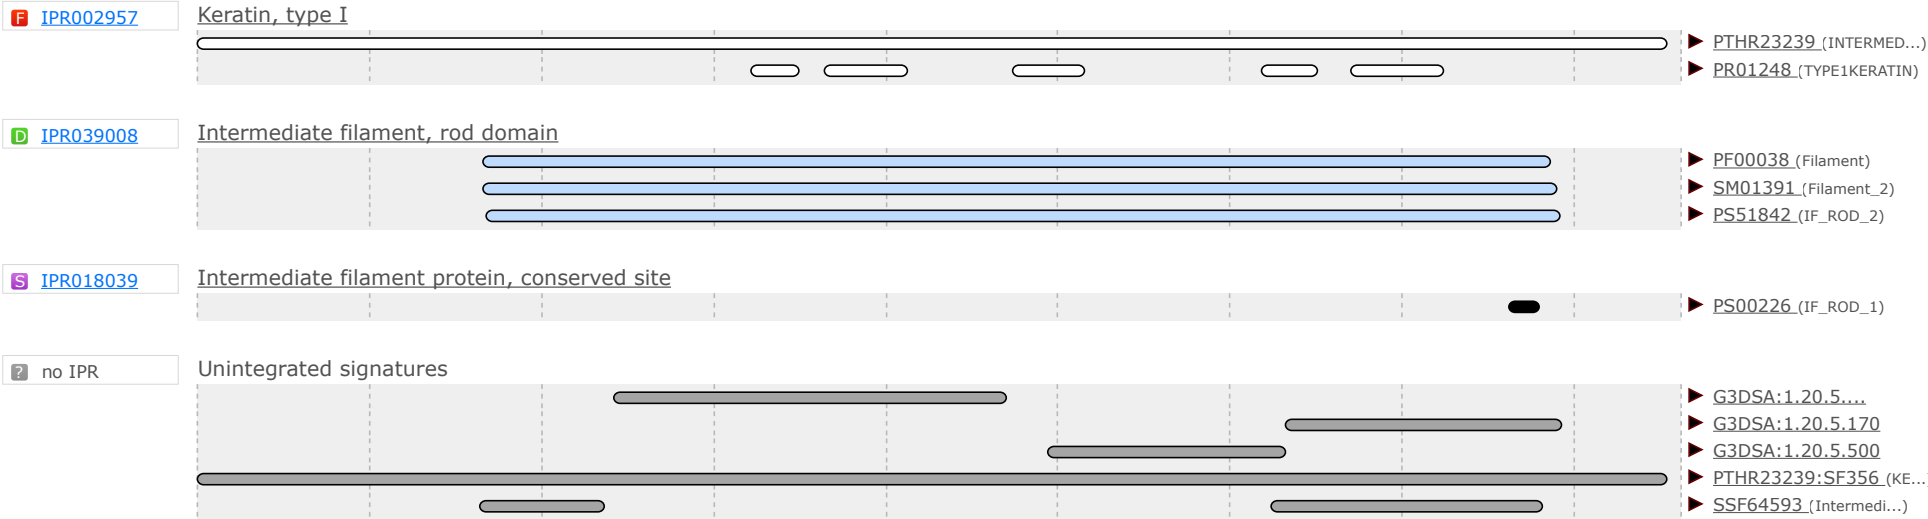

Other features

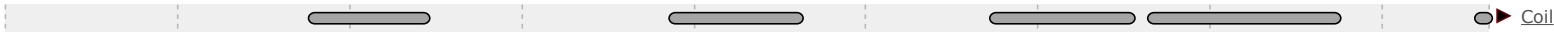

GO Term prediction

| Biological process | Molecular function                                      | Cellular component |
|--------------------|---------------------------------------------------------|--------------------|
| None predicted.    | <a href="#">GO:0005198</a> structural molecule activity | None predicted.    |

(I) krt18b

Length 405 amino acids

Protein family membership

- IP Keratin, type I (IPR002957)
  - IP Keratin, type I cytoskeletal 18 (IPR027695)

Homologous superfamilies none

Domains and repeats

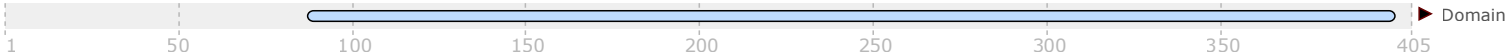

Detailed signature matches

IP IPR002957

Keratin, type I

PTHR23239 (INTERMED...)

PR01248 (TYPE1KERATIN)

IP IPR027695

Keratin, type I cytoskeletal 18

PTHR23239:SF349 (KE...)

ID IPR039008

Intermediate filament, rod domain

SM01391 (Filament\_2)

PF00038 (Filament)

PS51842 (IF\_ROD\_2)

IS IPR018039

Intermediate filament protein, conserved site

PS00226 (IF\_ROD\_1)

? no IPR

Unintegrated signatures

G3DSA:1.20.5....

G3DSA:1.20.5.170

G3DSA:1.20.5.500

SSF64593 (Intermedi...)

Other features

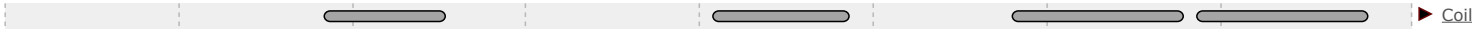

GO Term prediction

| Biological process | Molecular function                                      | Cellular component |
|--------------------|---------------------------------------------------------|--------------------|
| None predicted.    | <a href="#">GO:0005198</a> structural molecule activity | None predicted.    |

(I) krt99

Length 455 amino acids

Protein family membership

 Keratin, type I ([IPR002957](#))

Homologous superfamilies none

Domains and repeats

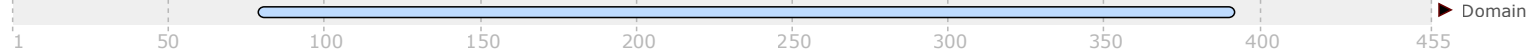

Detailed signature matches

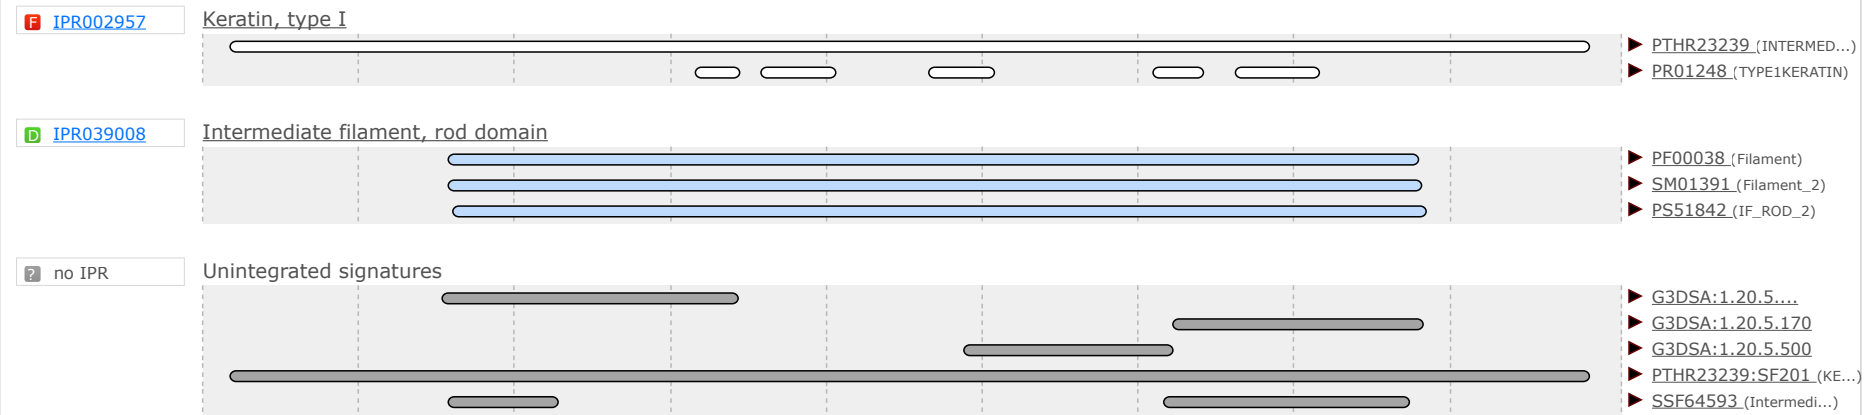

Other features

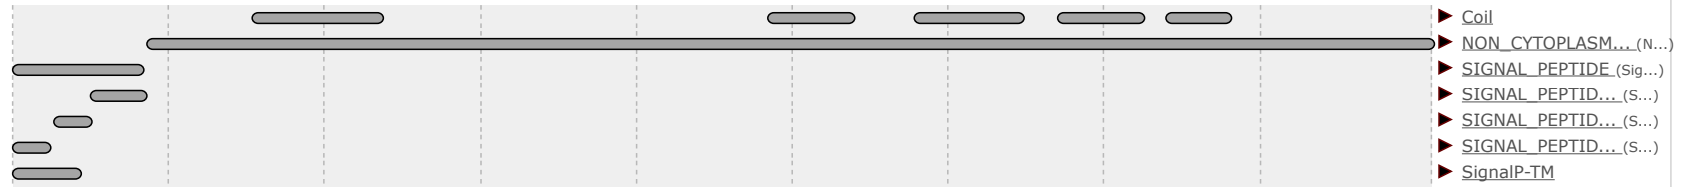

GO Term prediction

Biological process

None predicted.

Molecular function

[GO:0005198](#) structural molecule activity

Cellular component

None predicted.



Protein

(I) krt94

Length 431 amino acids

Protein family membership

 [Keratin, type I \(IPR002957\)](#)

Homologous superfamilies none

Domains and repeats

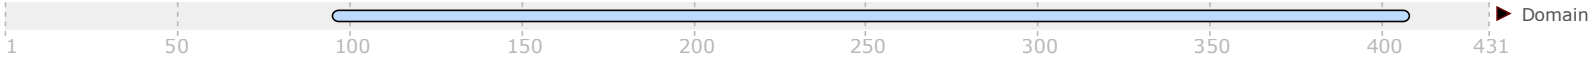

Detailed signature matches

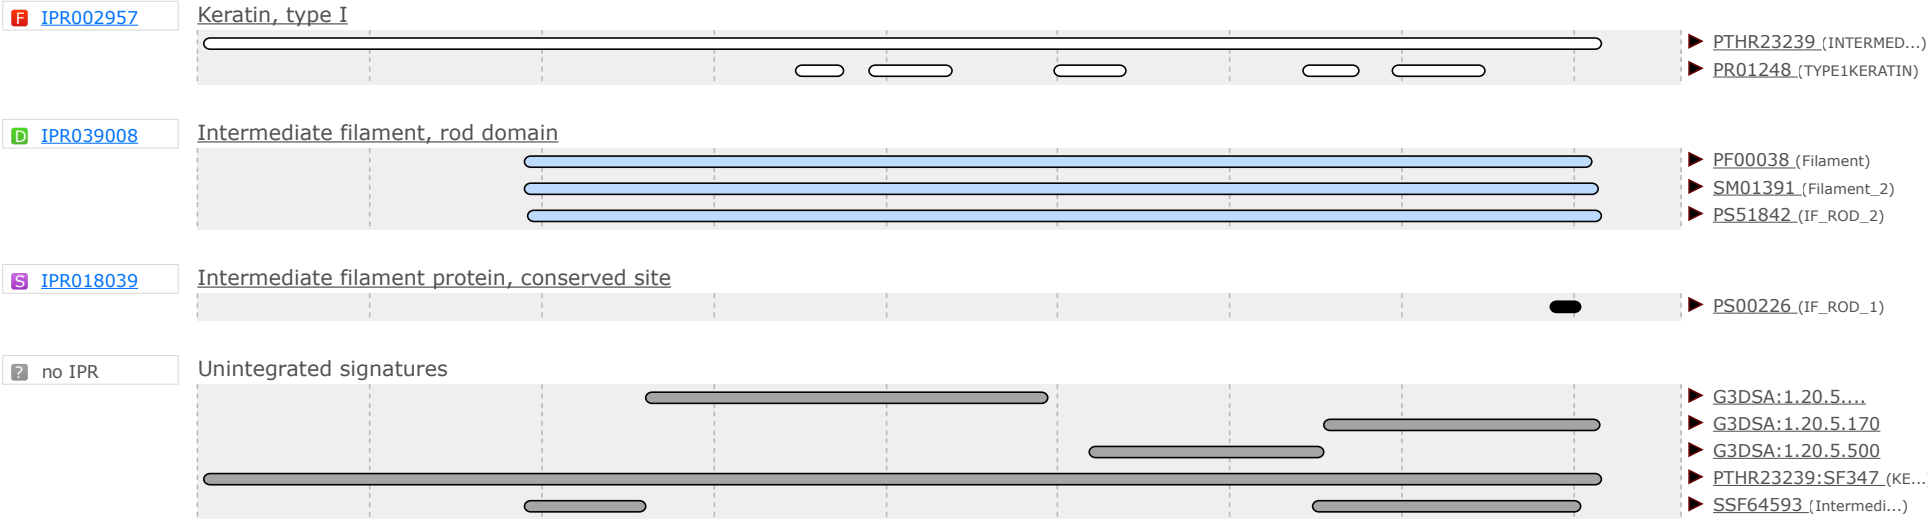

Other features

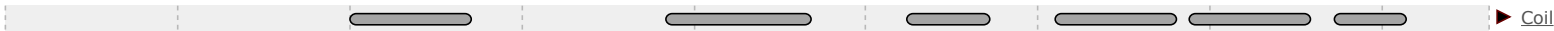

GO Term prediction

| Biological process | Molecular function                                      | Cellular component |
|--------------------|---------------------------------------------------------|--------------------|
| None predicted.    | <a href="#">GO:0005198</a> structural molecule activity | None predicted.    |

(I) krt93

Length 462 amino acids

Protein family membership

 Keratin, type I ([IPR002957](#))

Homologous superfamilies none

Domains and repeats

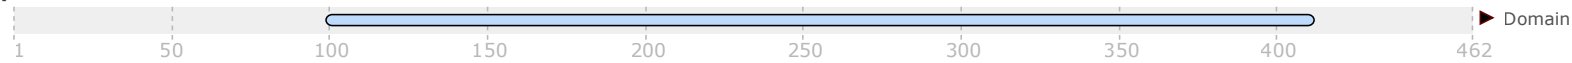

Detailed signature matches

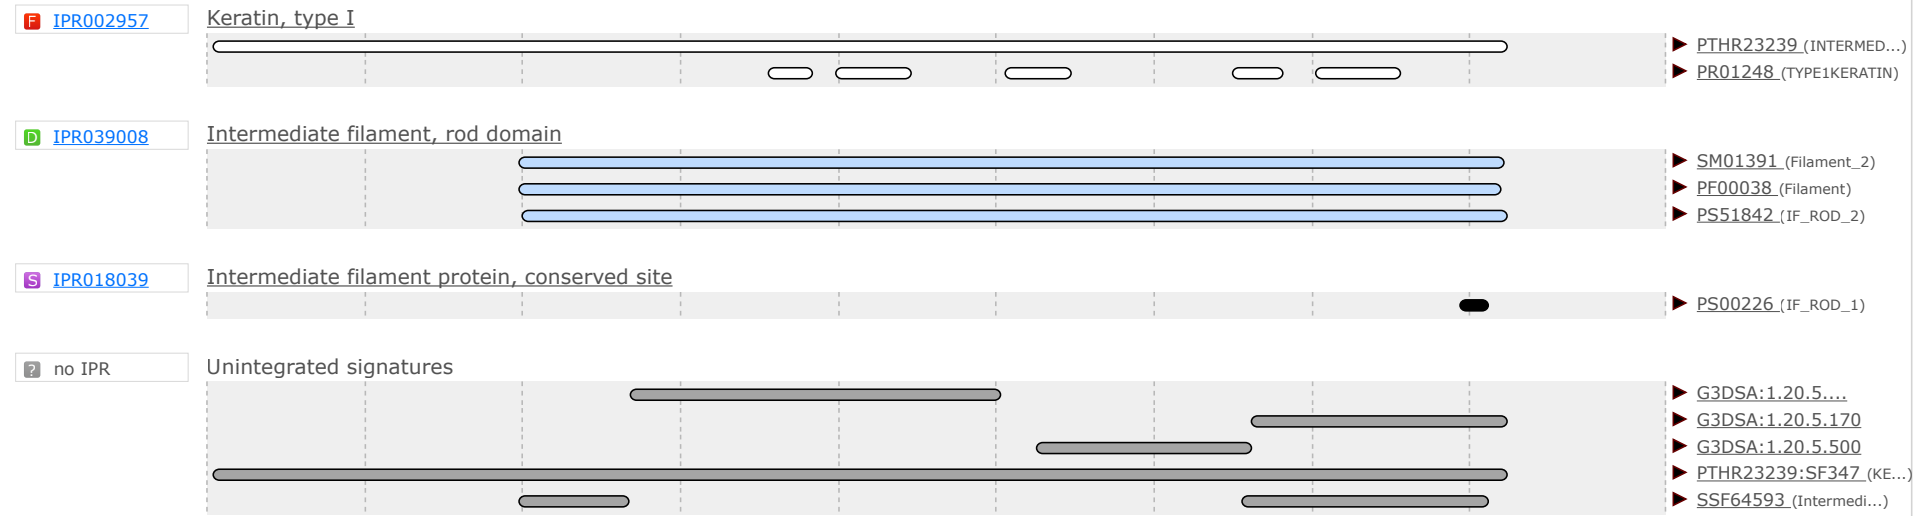

Other features

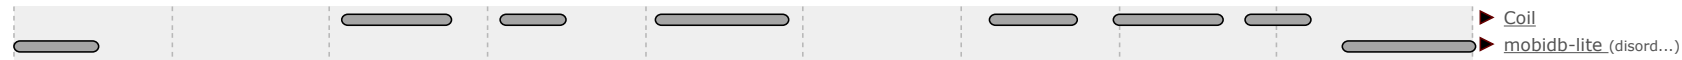

GO Term prediction

| Biological process | Molecular function                                      | Cellular component |
|--------------------|---------------------------------------------------------|--------------------|
| None predicted.    | <a href="#">GO:0005198</a> structural molecule activity | None predicted.    |

Protein

(I) krt95

Length 425 amino acids

Protein family membership

 [Keratin, type I \(IPR002957\)](#)

Homologous superfamilies none

Domains and repeats

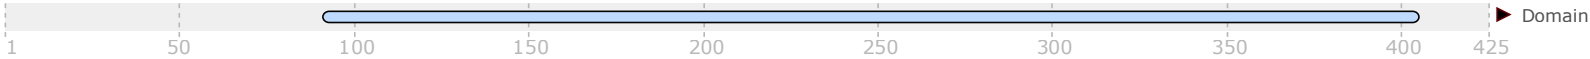

Detailed signature matches

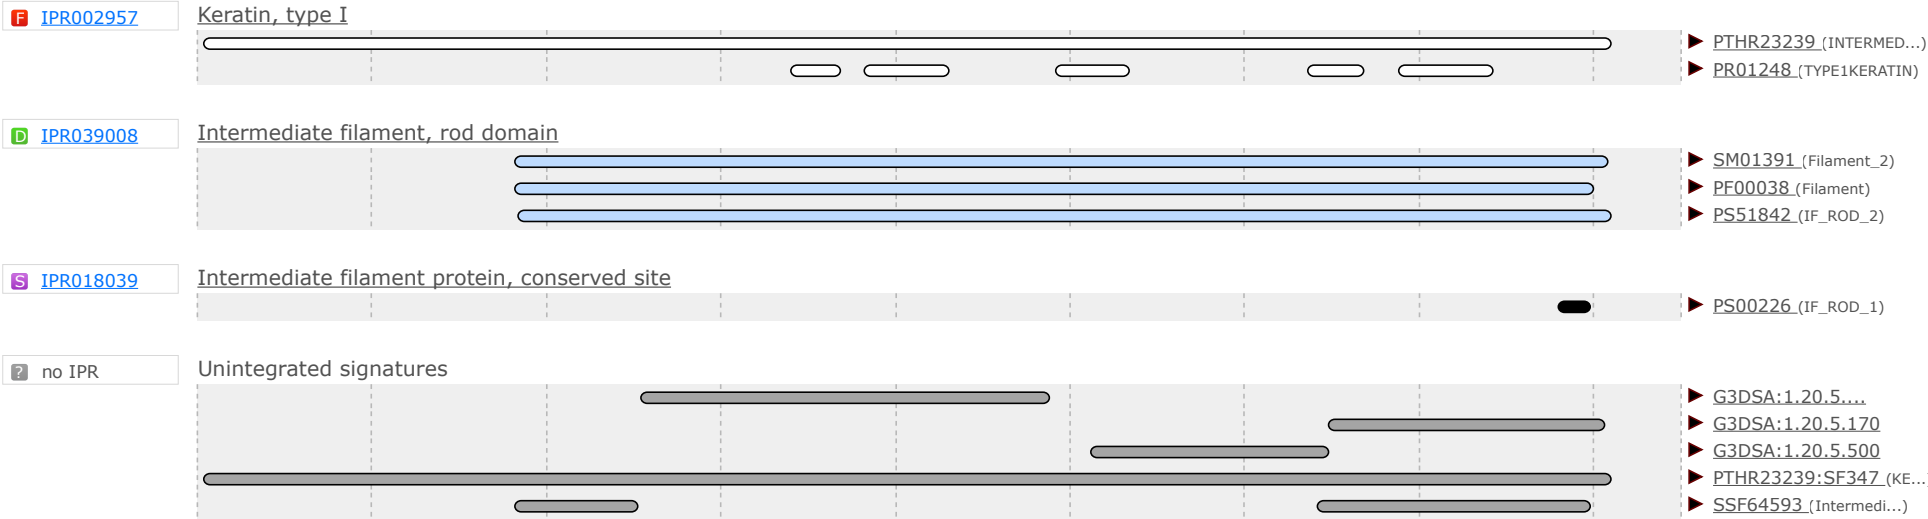

Other features

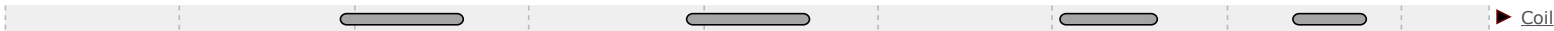

GO Term prediction

Biological process

None predicted.

Molecular function

[GO:0005198](#) structural molecule activity

Cellular component

None predicted.

Protein

(I) si:ch211-156l18.7

Length 365 amino acids

Protein family membership

 Keratin, type I ([IPR002957](#))

Homologous superfamilies none

Domains and repeats

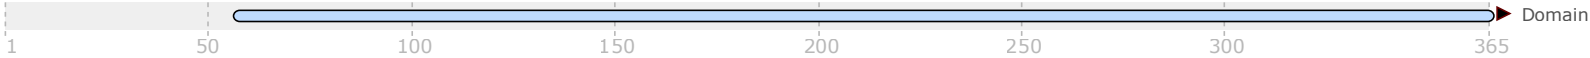

Detailed signature matches

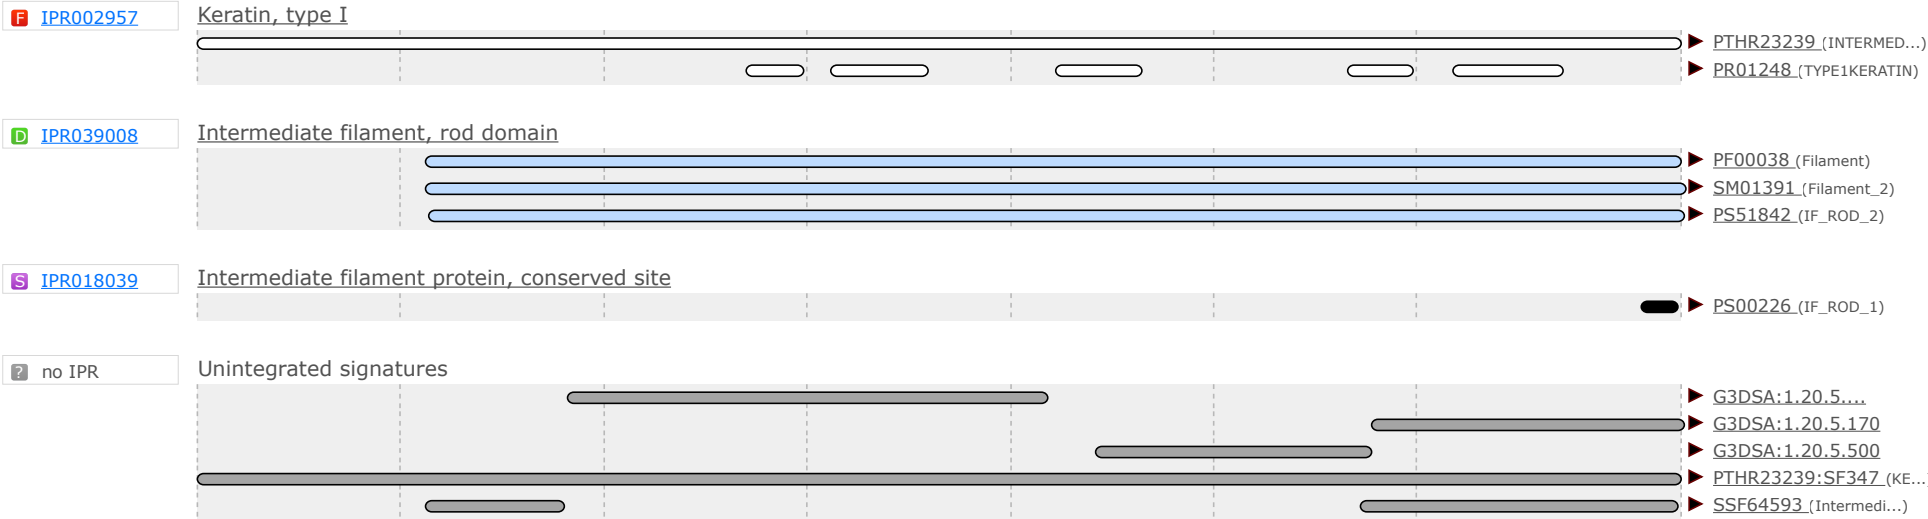

Other features

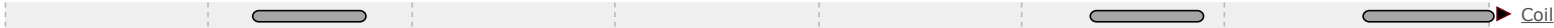

GO Term prediction

| Biological process | Molecular function                                      | Cellular component |
|--------------------|---------------------------------------------------------|--------------------|
| None predicted.    | <a href="#">GO:0005198</a> structural molecule activity | None predicted.    |

Protein

(I) krt98

Length 391 amino acids

Protein family membership

 [Keratin, type I \(IPR002957\)](#)

Homologous superfamilies none

Domains and repeats

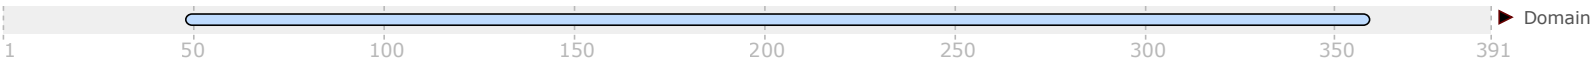

Detailed signature matches

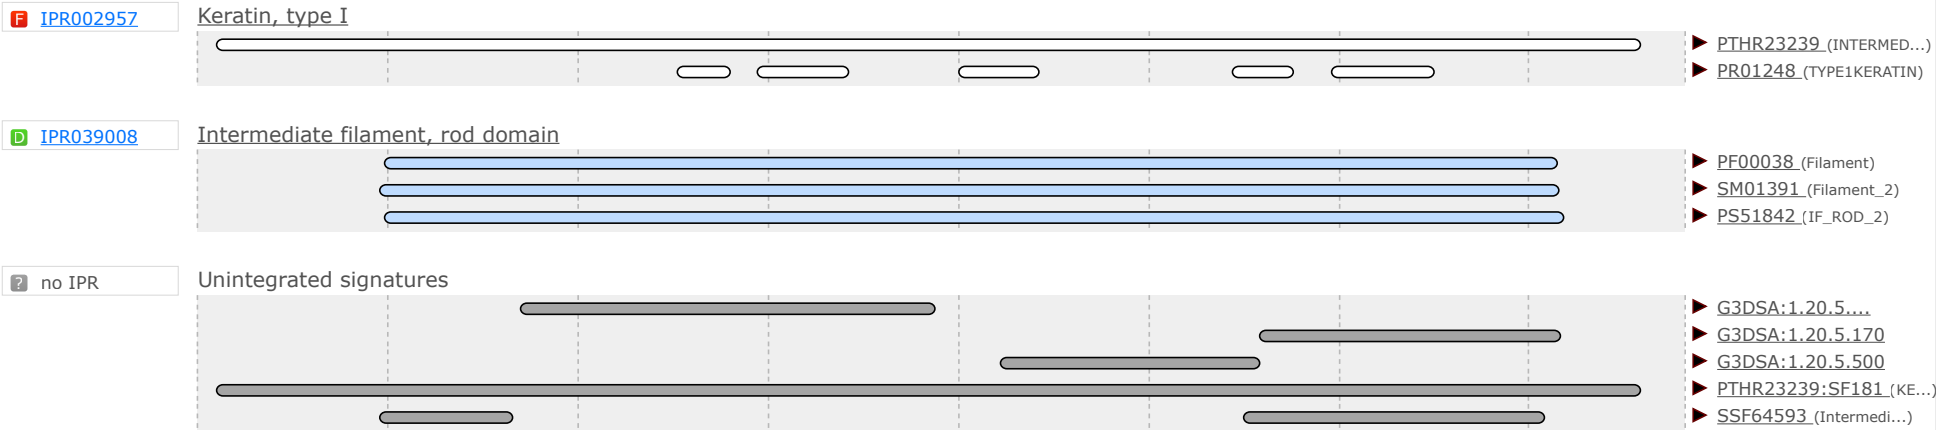

Other features

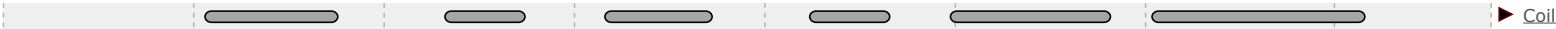

GO Term prediction

**Biological process**  
None predicted.

**Molecular function**  
[GO:0005198](#) structural molecule activity

**Cellular component**  
None predicted.

Protein

(I) krt96

Length 402 amino acids

Protein family membership

 [Keratin, type I \(IPR002957\)](#)

Homologous superfamilies none

Domains and repeats

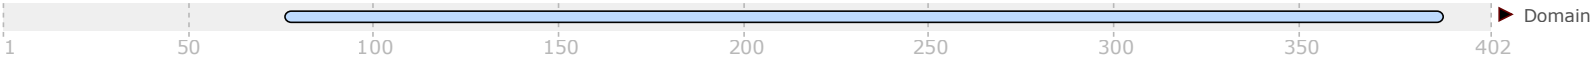

Detailed signature matches

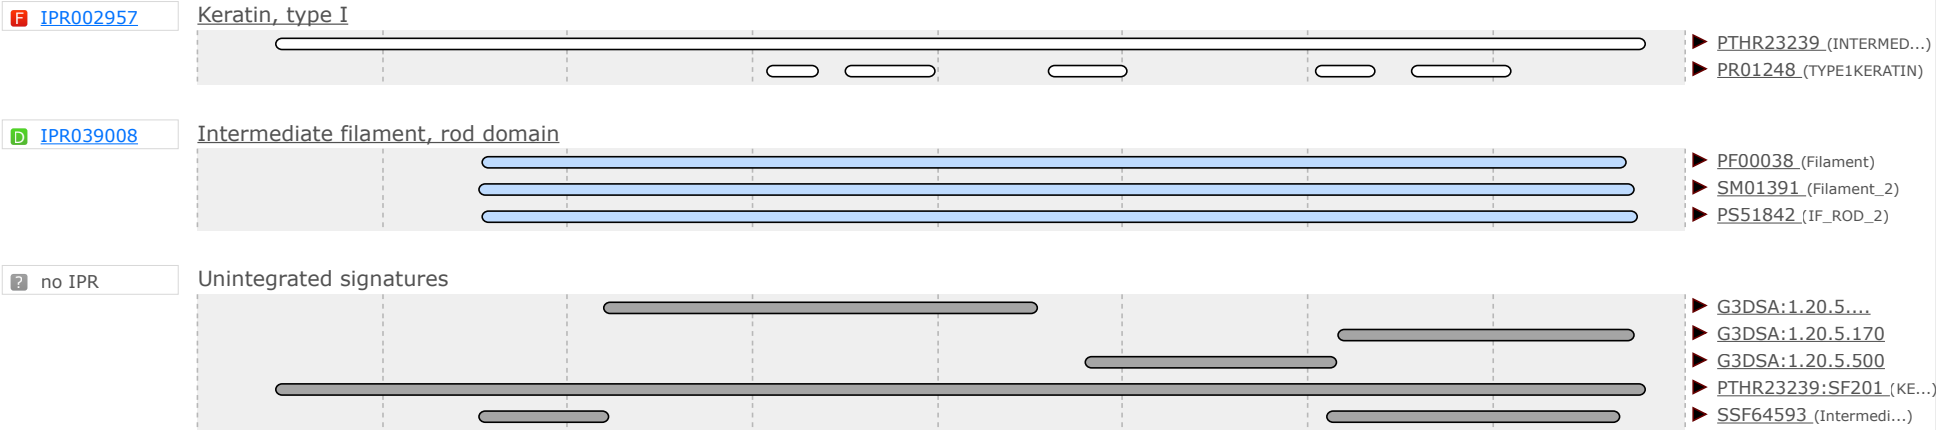

Other features

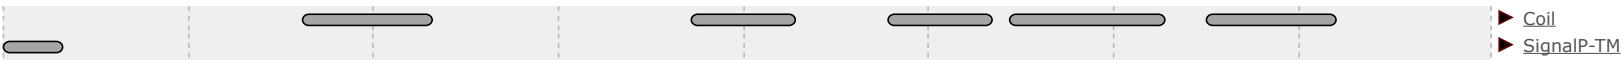

GO Term prediction

Biological process

None predicted.

Molecular function

[GO:0005198](#) structural molecule activity

Cellular component

None predicted.

(I) krt97

Length 438 amino acids

Protein family membership

 Keratin, type I ([IPR002957](#))

Homologous superfamilies none

Domains and repeats

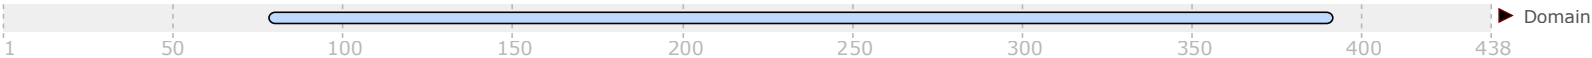

Detailed signature matches

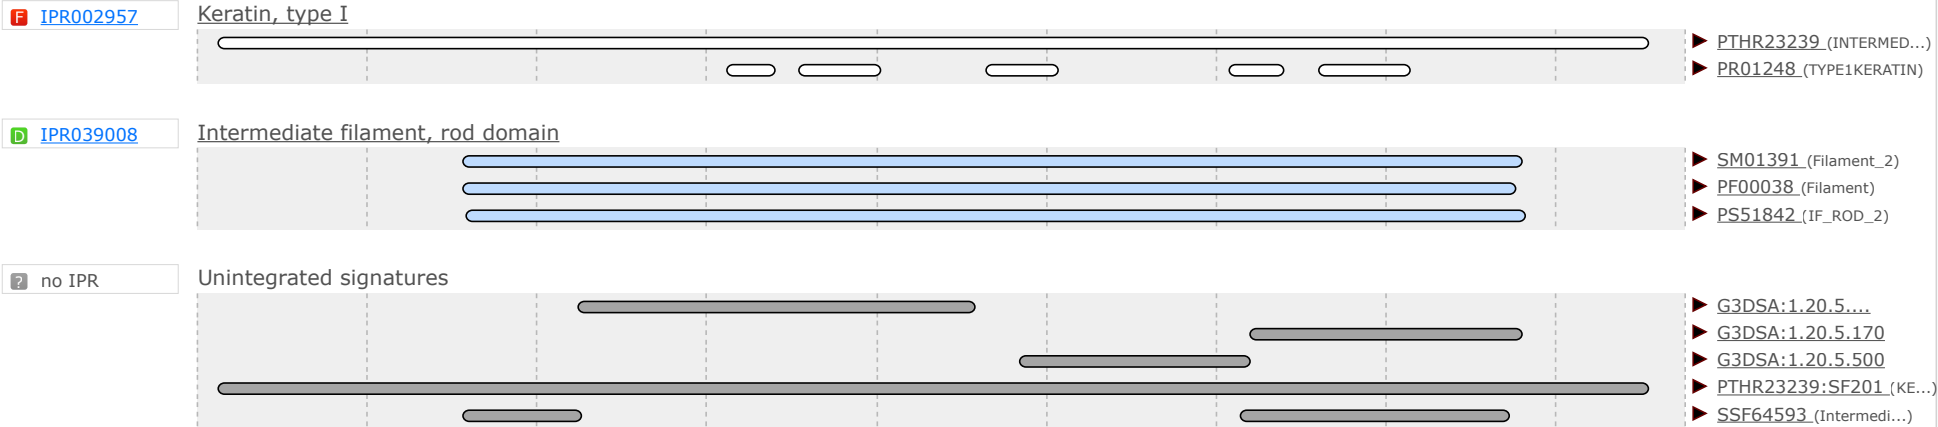

Other features

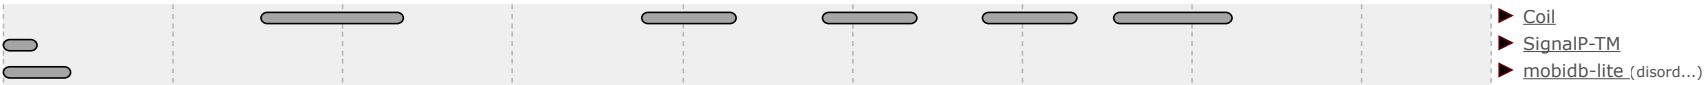

GO Term prediction

**Biological process**  
None predicted.

**Molecular function**  
[GO:0005198](#) structural molecule activity

**Cellular component**  
None predicted.

Protein

(I) krt15

Length 460 amino acids

Protein family membership

 Keratin, type I ([IPR002957](#))

Homologous superfamilies none

Domains and repeats

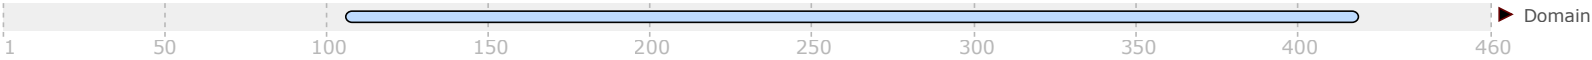

Detailed signature matches

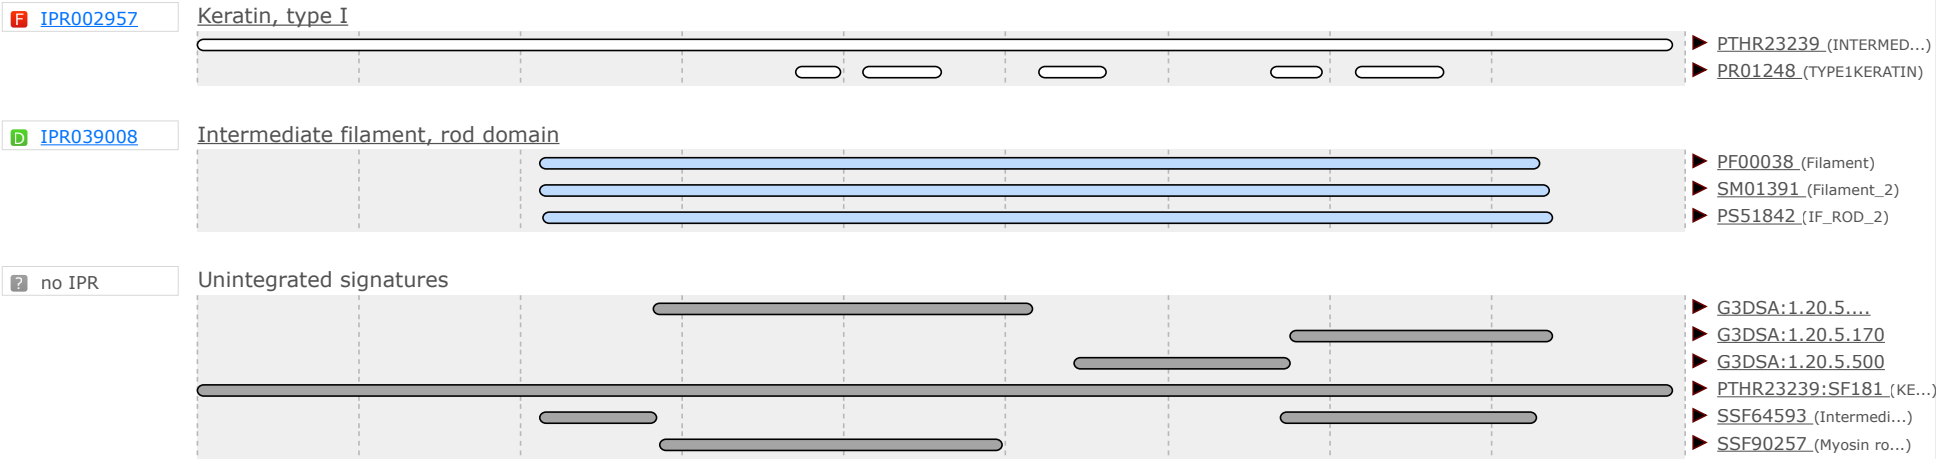

Other features

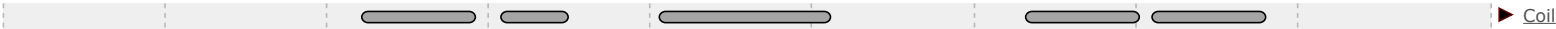

GO Term prediction

| Biological process | Molecular function                                      | Cellular component |
|--------------------|---------------------------------------------------------|--------------------|
| None predicted.    | <a href="#">GO:0005198</a> structural molecule activity | None predicted.    |



Protein

(I) krt1-19d

Length 423 amino acids

Protein family membership

 [Keratin, type I \(IPR002957\)](#)

Homologous superfamilies none

Domains and repeats

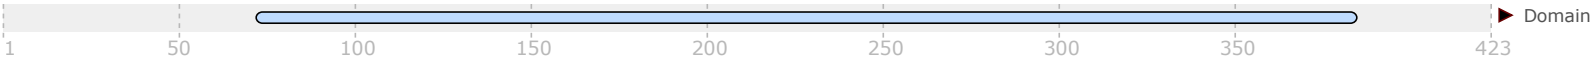

Detailed signature matches

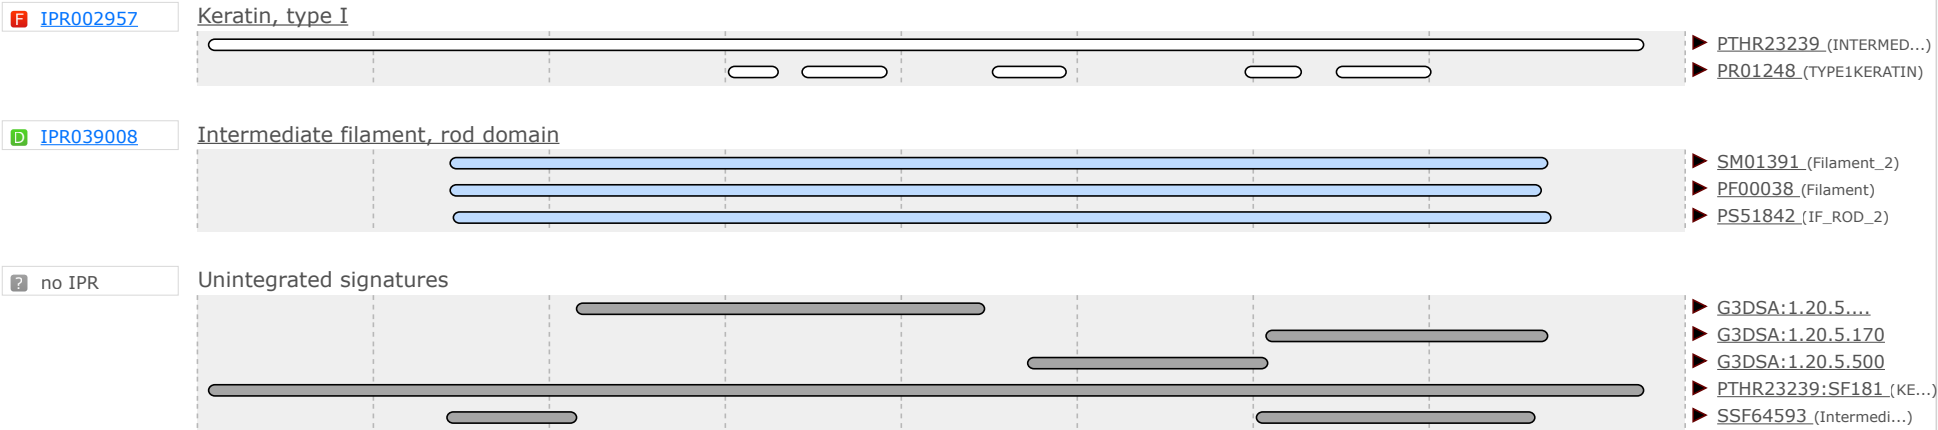

Other features

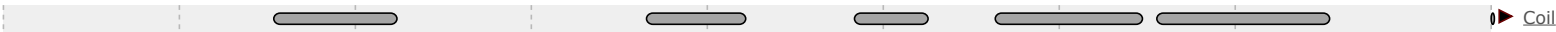

GO Term prediction

**Biological process**  
None predicted.

**Molecular function**  
[GO:0005198](#) structural molecule activity

**Cellular component**  
None predicted.

Protein

(I) krtt1c19e

Length 473 amino acids

Protein family membership

 [Keratin, type I \(IPR002957\)](#)

Homologous superfamilies none

Domains and repeats

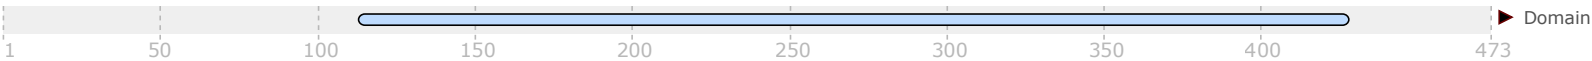

Detailed signature matches

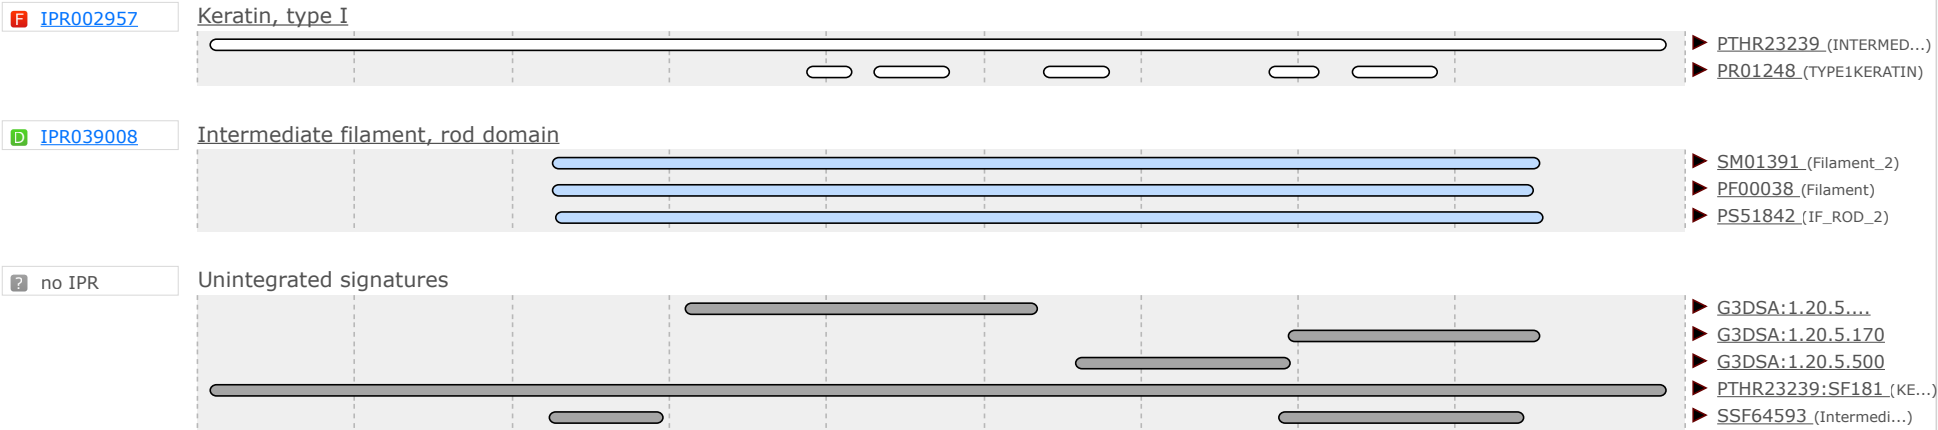

Other features

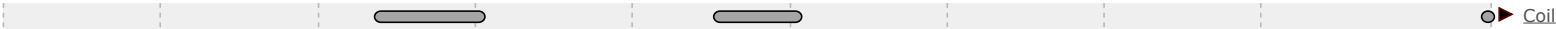

GO Term prediction

**Biological process**  
None predicted.

**Molecular function**  
[GO:0005198](#) structural molecule activity

**Cellular component**  
None predicted.

Protein

(I) krt91

Length 466 amino acids

Protein family membership

 Keratin, type I ([IPR002957](#))

Homologous superfamilies none

Domains and repeats

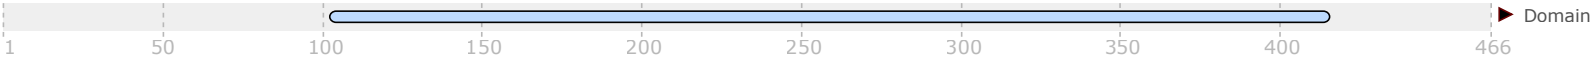

Detailed signature matches

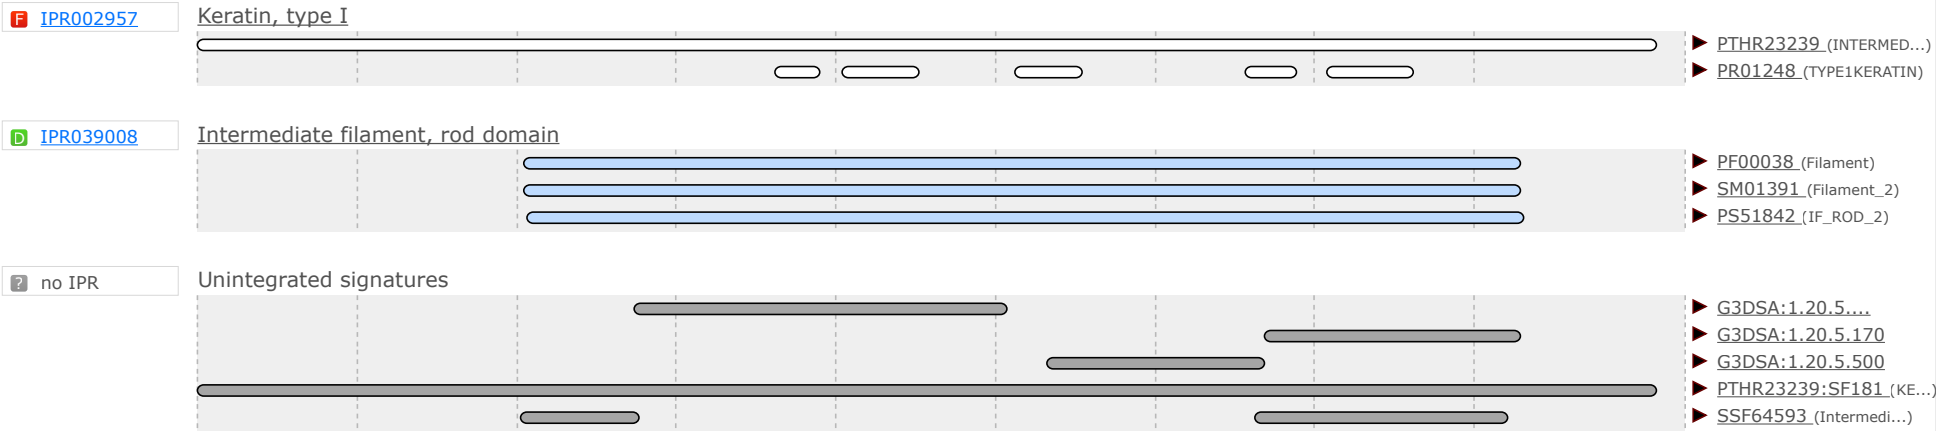

Other features

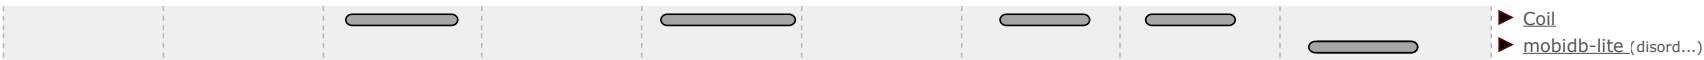

GO Term prediction

| Biological process | Molecular function                                      | Cellular component |
|--------------------|---------------------------------------------------------|--------------------|
| None predicted.    | <a href="#">GO:0005198</a> structural molecule activity | None predicted.    |

Protein

(I) krt92

Length 431 amino acids

Protein family membership

 Keratin, type I ([IPR002957](#))

Homologous superfamilies none

Domains and repeats

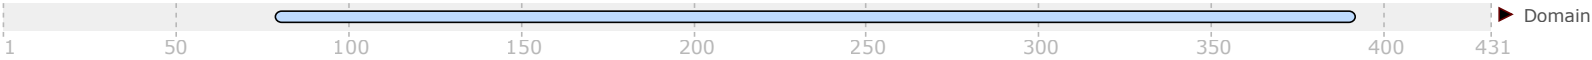

Detailed signature matches

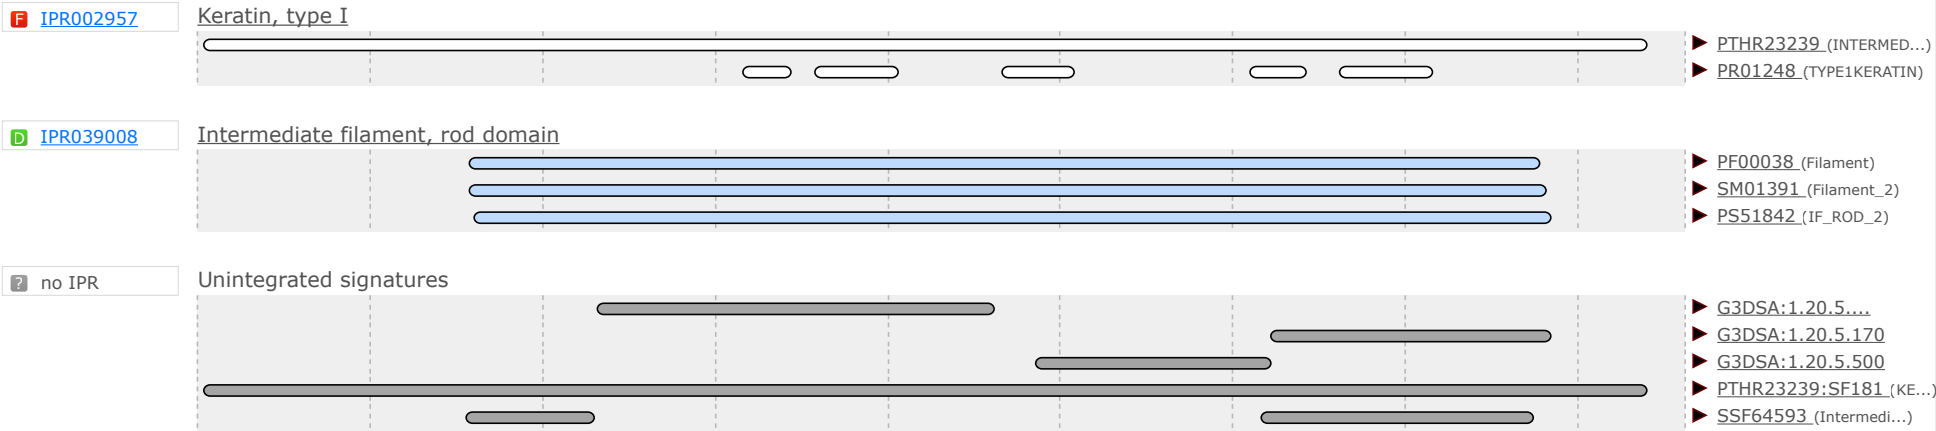

Other features

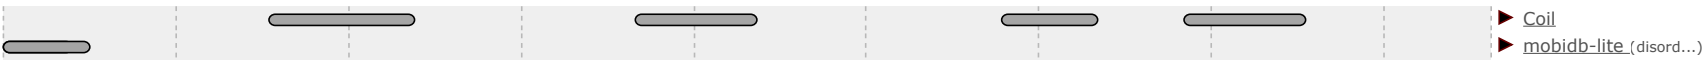

GO Term prediction

| Biological process | Molecular function                                      | Cellular component |
|--------------------|---------------------------------------------------------|--------------------|
| None predicted.    | <a href="#">GO:0005198</a> structural molecule activity | None predicted.    |

Protein

(I) krt17

Length 423 amino acids

Protein family membership

 [Keratin, type I \(IPR002957\)](#)

Homologous superfamilies none

Domains and repeats

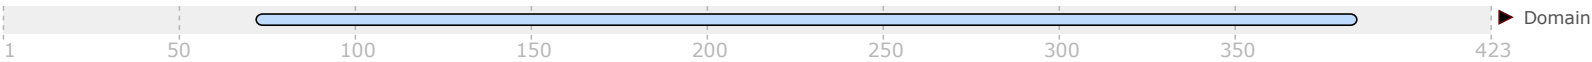

Detailed signature matches

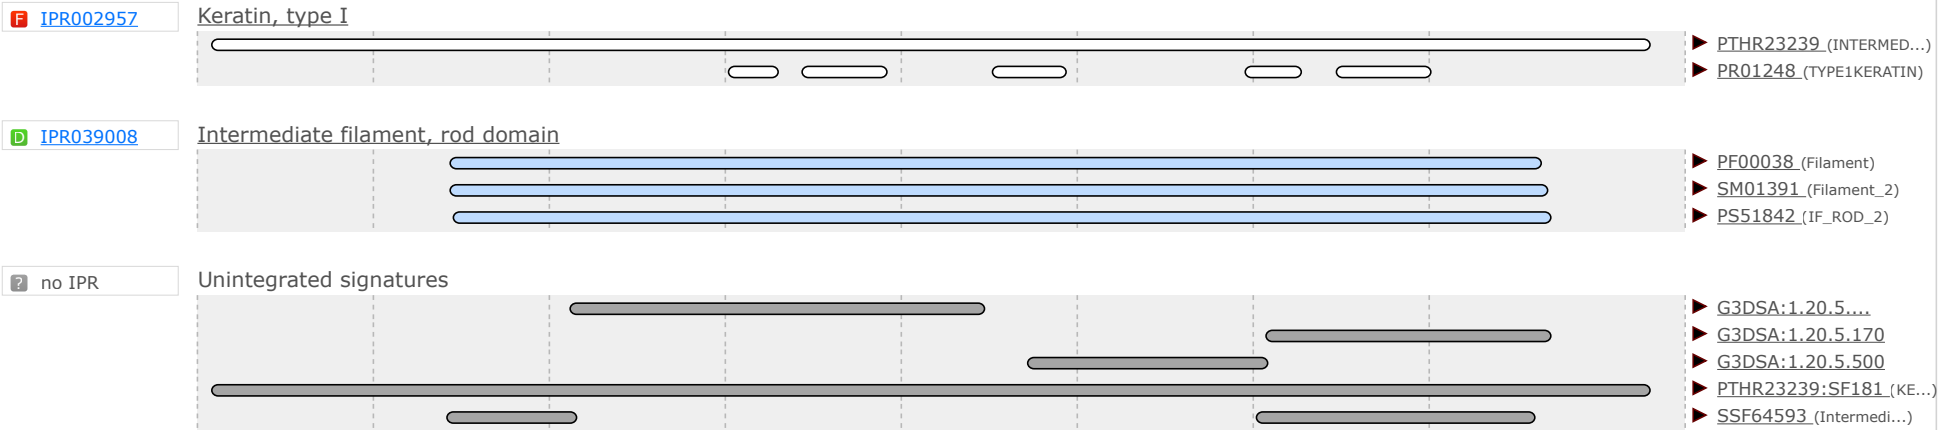

Other features

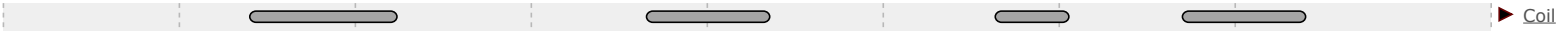

GO Term prediction

**Biological process**  
None predicted.

**Molecular function**  
[GO:0005198](#) structural molecule activity

**Cellular component**  
None predicted.

Protein

(I) cyt1

Length 429 amino acids

Protein family membership

 [Keratin, type I \(IPR002957\)](#)

Homologous superfamilies none

Domains and repeats

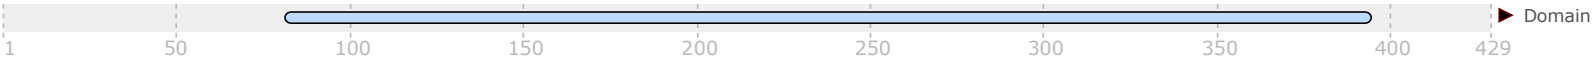

Detailed signature matches

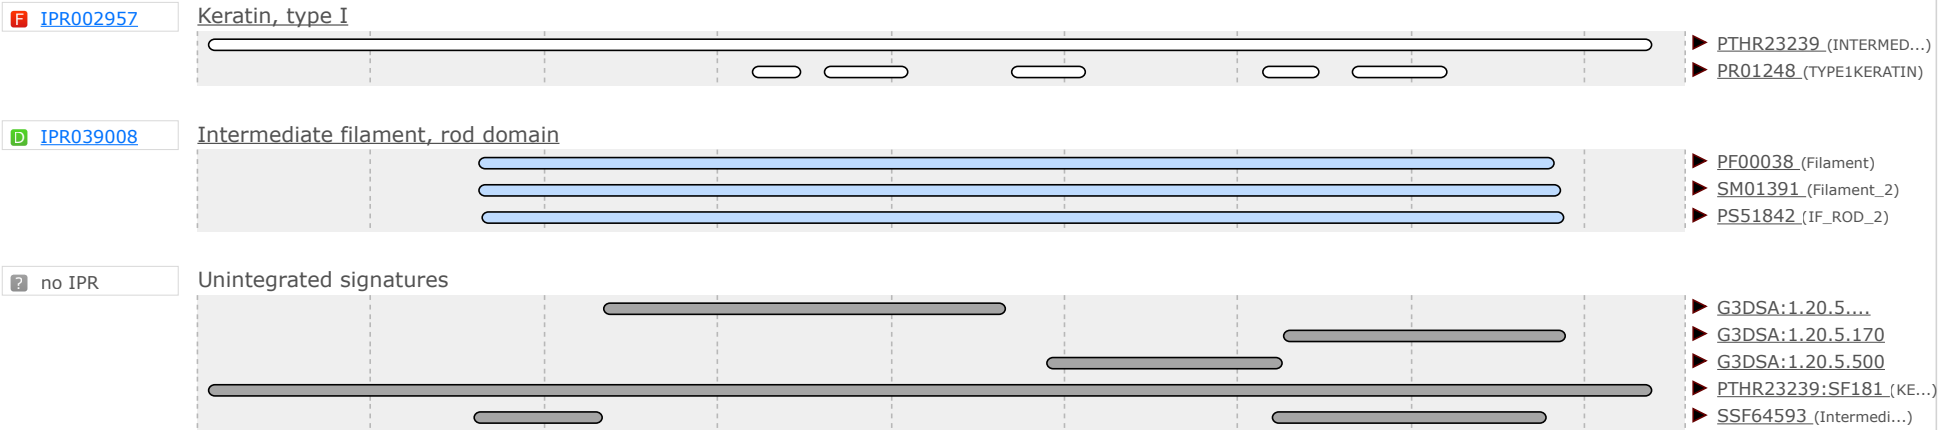

Other features

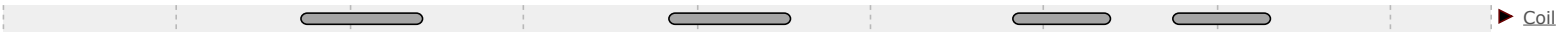

GO Term prediction

**Biological process**  
None predicted.

**Molecular function**  
[GO:0005198](#) structural molecule activity

**Cellular component**  
None predicted.

Protein

(I) cyt1l

Length 429 amino acids

Protein family membership

 [Keratin, type I \(IPR002957\)](#)

Homologous superfamilies none

Domains and repeats

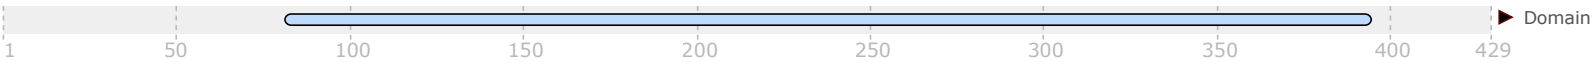

Detailed signature matches

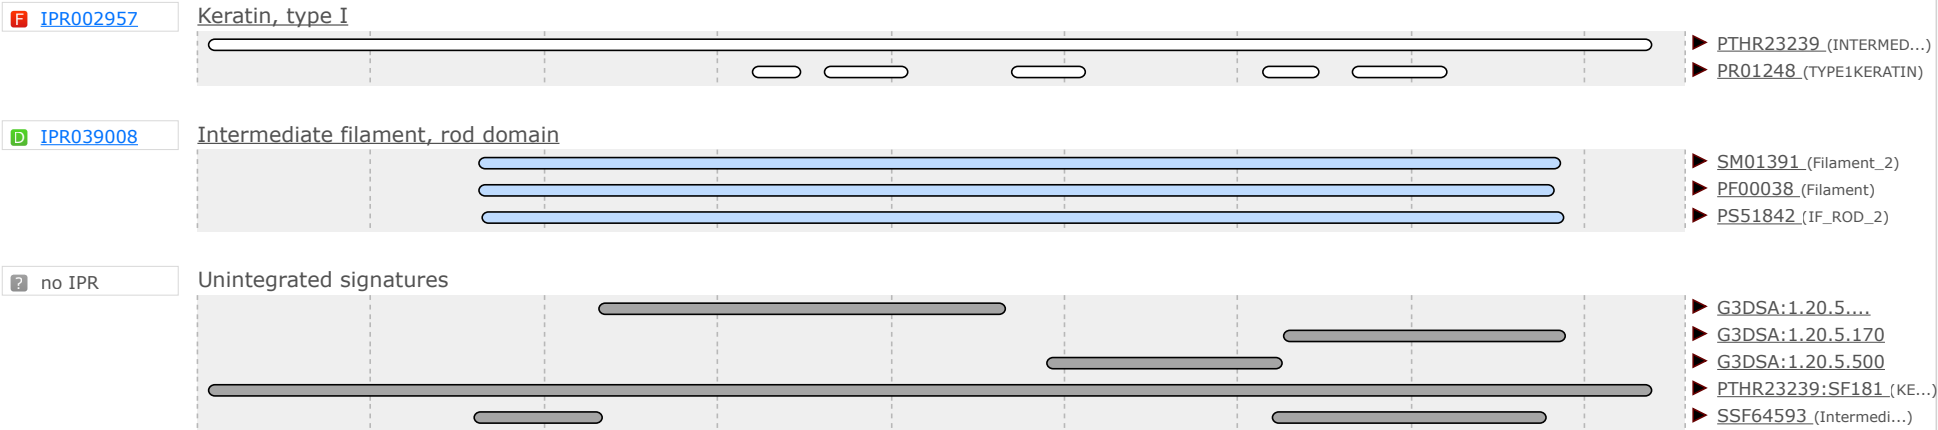

Other features

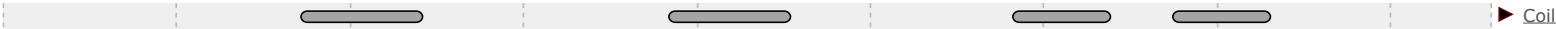

GO Term prediction

**Biological process**  
None predicted.

**Molecular function**  
[GO:0005198](#) structural molecule activity

**Cellular component**  
None predicted.

(II) krtt2c22

**Length** 438 amino acids

**Protein family membership**

■ [Keratin, type II \(IPR003054\)](#)

**Homologous superfamilies** none

**Domains and repeats**

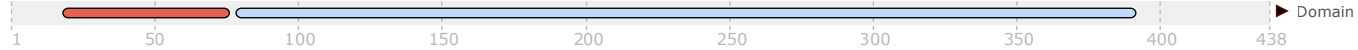

**Detailed signature matches**

■ [IPR003054](#) Keratin, type II [PR01276](#) (TYPE2KERATIN)

■ [IPR032444](#) Keratin type II head [PF16208](#) (Keratin\_2...)

■ [IPR039008](#) Intermediate filament, rod domain [SM01391](#) (Filament\_2)  
[PF00038](#) (Filament)  
[PS51842](#) (IF\_ROD\_2)

■ [IPR018039](#) Intermediate filament protein, conserved site [PS00226](#) (IF\_ROD\_1)

■ no IPR Unintegrated signatures [G3DSA:1.20.5...](#)  
[G3DSA:1.20.5.170](#)  
[G3DSA:1.20.5.500](#)  
[PTHR45616](#) (FAMILY N...)  
[PTHR45616:SF9](#) (SI:D...)  
[SSF64593](#) (Intermedi...)

**Other features**

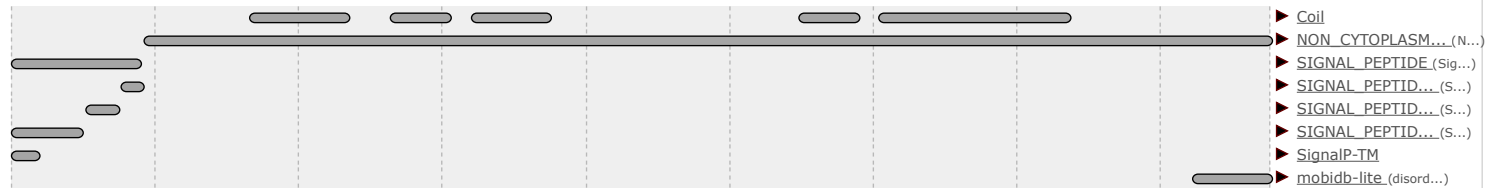

**GO Term prediction**

**Biological process**

None predicted.

**Molecular function**

None predicted.

**Cellular component**

[GO:0045095](#) keratin filament



(II) krtd2c8

Length 382 amino acids

Protein family membership

 Keratin, type II ([IPR003054](#))

Homologous superfamilies none

Domains and repeats

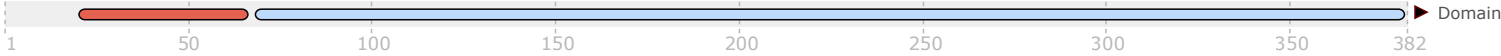

Detailed signature matches

 [IPR003054](#)

Keratin, type II



► [PR01276](#) (TYPE2KERATIN)

 [IPR032444](#)

Keratin type II head



► [PF16208](#) (Keratin\_2\_...)

 [IPR039008](#)

Intermediate filament, rod domain



► [PF00038](#) (Filament)  
► [SM01391](#) (Filament\_2)  
► [PS51842](#) (IF\_ROD\_2)

 [IPR018039](#)

Intermediate filament protein, conserved site



► [PS00226](#) (IF\_ROD\_1)

 no IPR

Unintegrated signatures



► [G3DSA:1.20.5....](#)  
► [G3DSA:1.20.5.170](#)  
► [G3DSA:1.20.5.500](#)  
► [PTHR45616](#) (FAMILY N...)  
► [PTHR45616:SF9](#) (SI:D...)  
► [SSF64593](#) (Intermedi...)

Other features

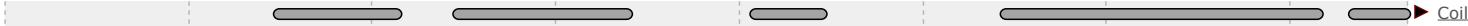

GO Term prediction

| Biological process | Molecular function | Cellular component                          |
|--------------------|--------------------|---------------------------------------------|
| None predicted.    | None predicted.    | <a href="#">GO:0045095</a> keratin filament |

(II) krt8

Length 520 amino acids

Protein family membership

 Keratin, type II ([IPR003054](#))

Homologous superfamilies none

Domains and repeats

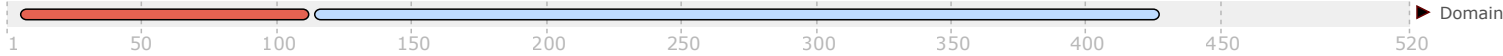

Detailed signature matches

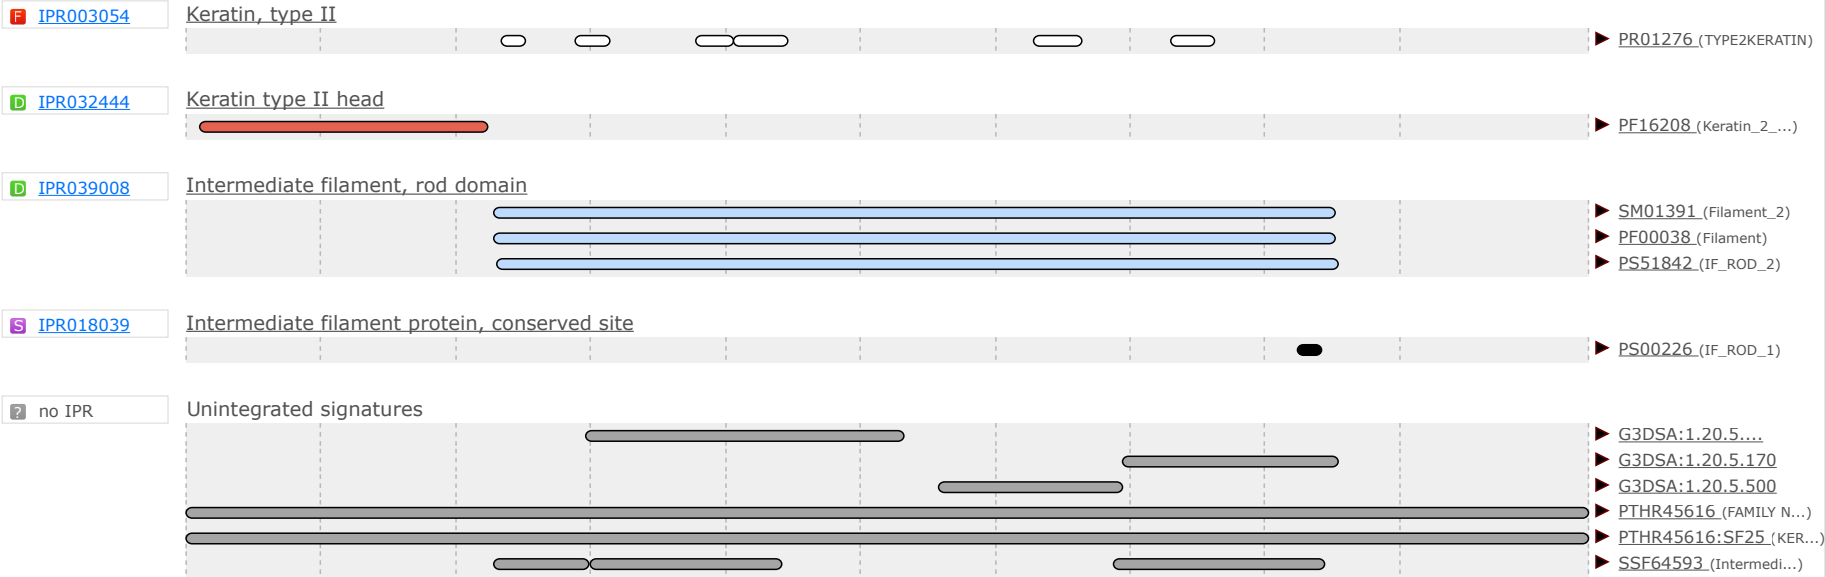

Other features

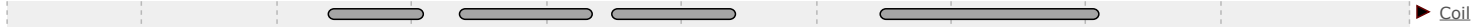

GO Term prediction

| Biological process | Molecular function | Cellular component                          |
|--------------------|--------------------|---------------------------------------------|
| None predicted.    | None predicted.    | <a href="#">GO:0045095</a> keratin filament |

(II) krtt2c6

Length 486 amino acids

Protein family membership

 Keratin, type II ([IPR003054](#))

Homologous superfamilies none

Domains and repeats

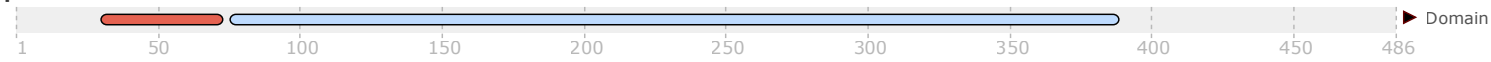

Detailed signature matches

 [IPR003054](#) Keratin, type II 

 [IPR032444](#) Keratin type II head 

 [IPR039008](#) Intermediate filament, rod domain 

 [IPR018039](#) Intermediate filament protein, conserved site 

 no IPR Unintegrated signatures 

Other features

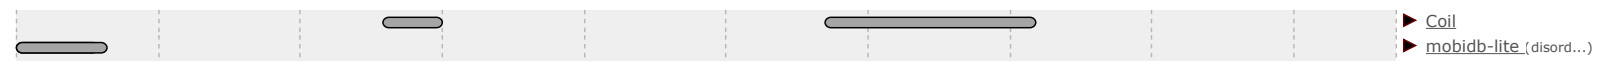

GO Term prediction

**Biological process**  
None predicted.

**Molecular function**  
None predicted.

**Cellular component**  
[GO:0045095](#) keratin filament

(II) krt4

Length 497 amino acids

Protein family membership

 Keratin, type II ([IPR003054](#))

Homologous superfamilies none

Domains and repeats

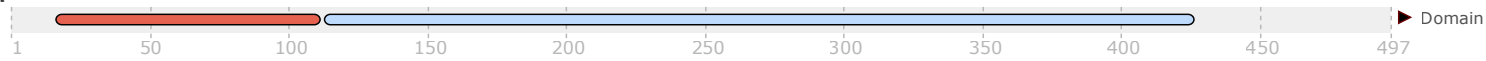

Detailed signature matches

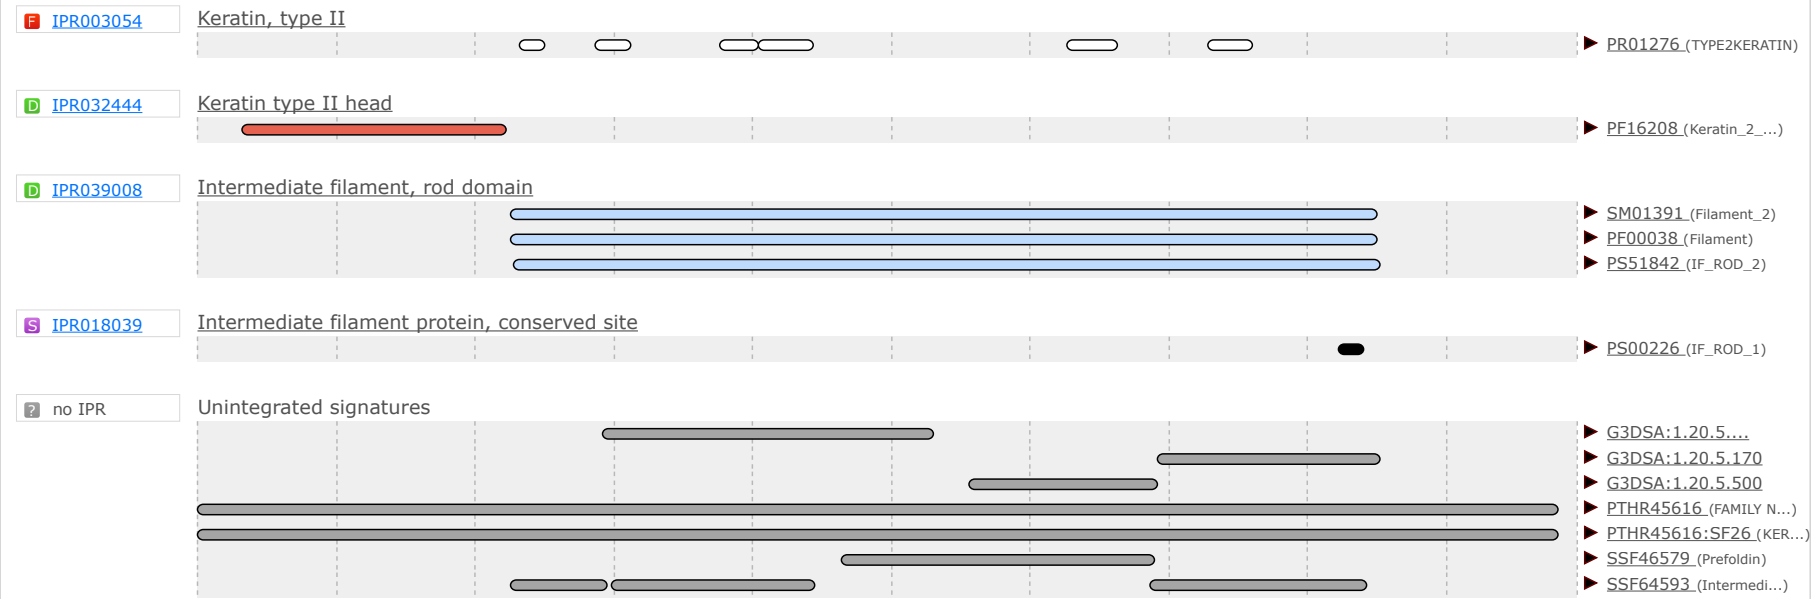

Other features

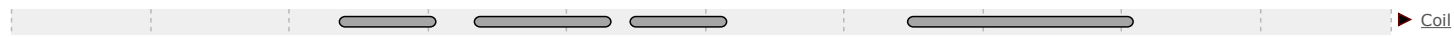

GO Term prediction

**Biological process**  
None predicted.

**Molecular function**  
None predicted.

**Cellular component**  
[GO:0045095](#) keratin filament

(II) krt5

Length 566 amino acids

Protein family membership

🔴 [Keratin, type II \(IPR003054\)](#)

Homologous superfamilies none

Domains and repeats

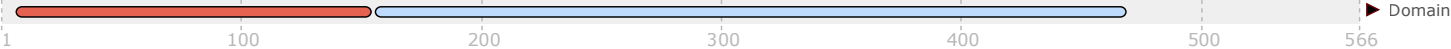

Detailed signature matches

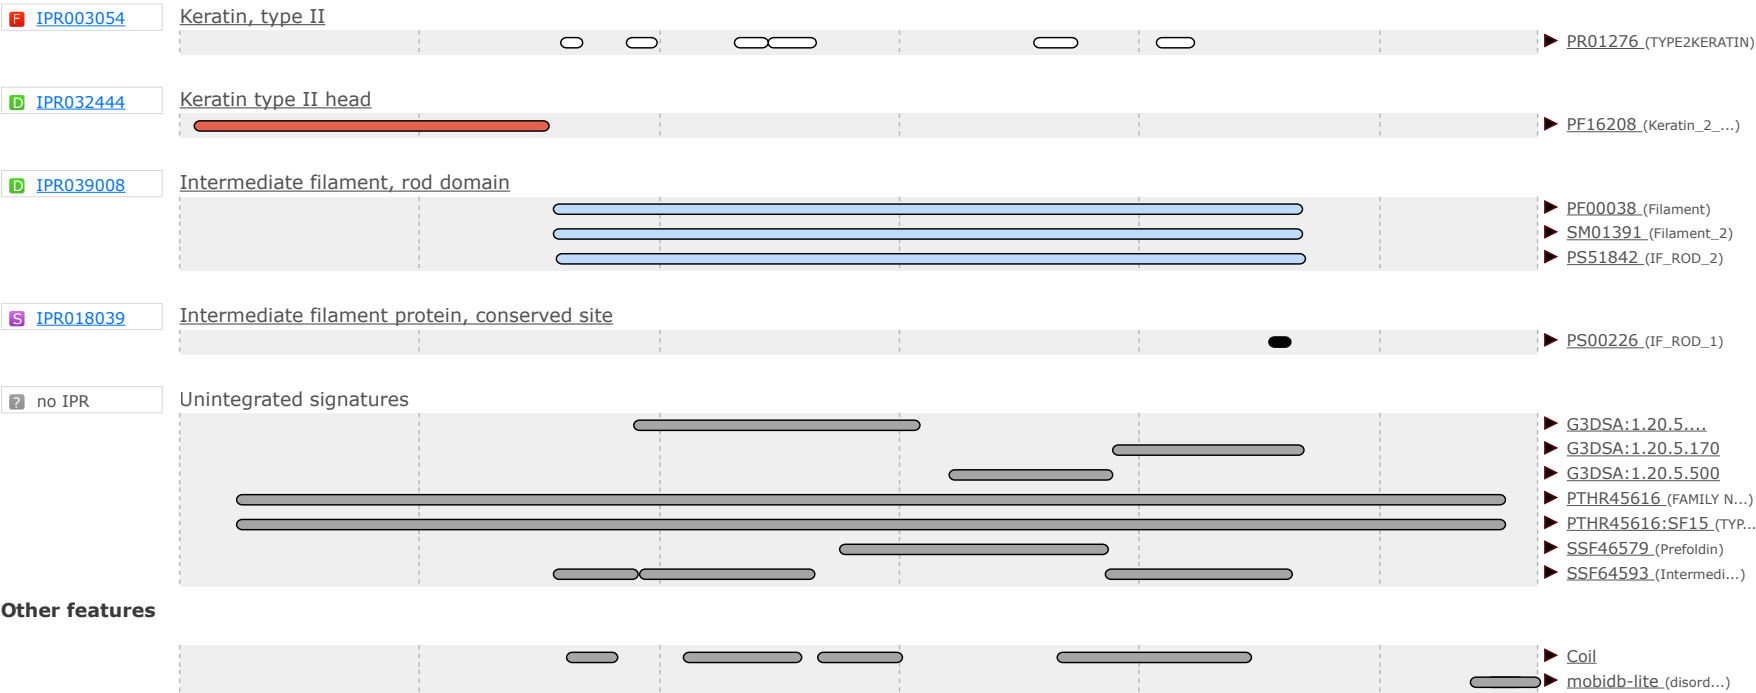

GO Term prediction

Biological process

None predicted.

Molecular function

None predicted.

Cellular component

[GO:0045095](#) keratin filament

(other I.F.) prph

Length 442 amino acids

Protein family membership

- Peripherin/Plastacin (IPR027700)
- Keratin, type I (IPR002957)

Homologous superfamilies none

Domains and repeats

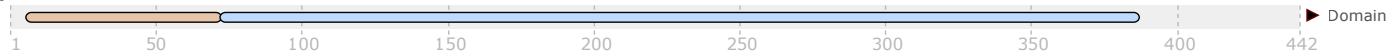

Detailed signature matches

- IPR027700 Peripherin/Plastacin PTHR45652:SF14 (PER...)
- IPR002957 Keratin, type I PR01248 (TYPE1KERATIN)
- IPR006821 Intermediate filament head, DNA-binding domain PF04732 (Filament\_head)
- IPR039008 Intermediate filament, rod domain PF00038 (Filament), SM01391 (Filament\_2), PS51842 (IF\_ROD\_2)
- IPR018039 Intermediate filament protein, conserved site PS00226 (IF\_ROD\_1)
- no IPR Unintegrated signatures G3DSA:1.20.5..., G3DSA:1.20.5.170, G3DSA:1.20.5.500, PTHR45652 (FAMILY N...), SSF64593 (Intermedi...)

Other features

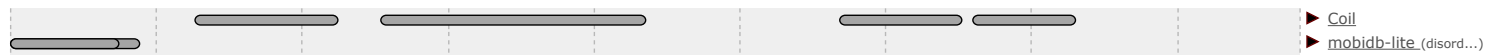

GO Term prediction

- | Biological process                                         | Molecular function                      | Cellular component                        |
|------------------------------------------------------------|-----------------------------------------|-------------------------------------------|
| GO:0045104 intermediate filament cytoskeleton organization | GO:0005198 structural molecule activity | GO:0005882 intermediate filament          |
|                                                            | GO:0005515 protein binding              | GO:0045098 type III intermediate filament |

(other I.F.) gfap

Length 444 amino acids

Protein family membership

- Glial fibrillary acidic protein (IPR027701)
- Keratin, type I (IPR002957)

Homologous superfamilies none

Domains and repeats

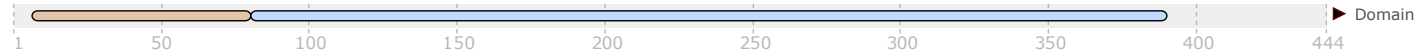

Detailed signature matches

- IPR027701 Glial fibrillary acidic protein PTHR45652:SF9 (GLIA...)
- IPR002957 Keratin, type I PR01248 (TYPE1KERATIN)
- IPR006821 Intermediate filament head, DNA-binding domain PF04732 (Filament\_head)
- IPR039008 Intermediate filament, rod domain PF00038 (Filament), SM01391 (Filament\_2), PS51842 (IF\_ROD\_2)
- IPR018039 Intermediate filament protein, conserved site PS00226 (IF\_ROD\_1)
- no IPR Unintegrated signatures G3DSA:1.20.5..., G3DSA:1.20.5.170, G3DSA:1.20.5.500, PTHR45652 (FAMILY N...), SSF64593 (Intermedi...)

Other features

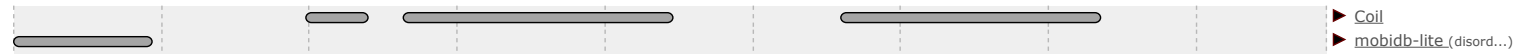

GO Term prediction

| Biological process | Molecular function                      | Cellular component               |
|--------------------|-----------------------------------------|----------------------------------|
| None predicted.    | GO:0005198 structural molecule activity | GO:0005882 intermediate filament |

(other I.F.) zgc:65851

Length 562 amino acids

Protein family membership

 Keratin, type I ([IPR002957](#))

Homologous superfamilies none

Domains and repeats

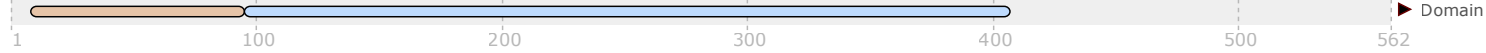

Detailed signature matches

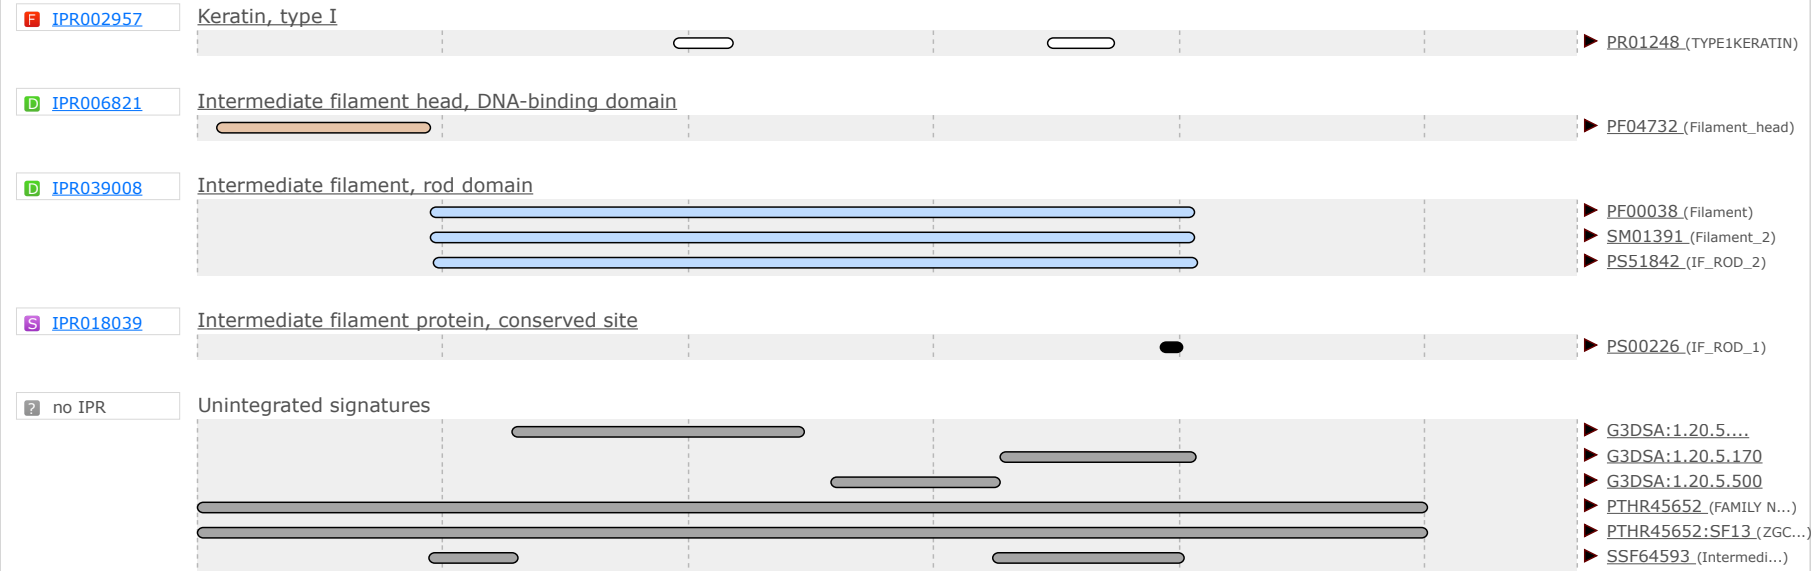

Other features

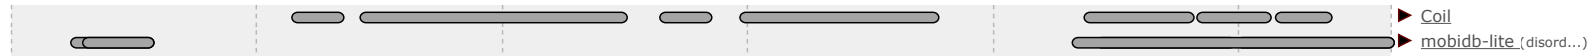

GO Term prediction

| Biological process | Molecular function                                      | Cellular component                               |
|--------------------|---------------------------------------------------------|--------------------------------------------------|
| None predicted.    | <a href="#">GO:0005198</a> structural molecule activity | <a href="#">GO:0005882</a> intermediate filament |



(other I.F.) neflb

Length 579 amino acids

Protein family membership

- Neurofilament light polypeptide (IPR027692)
- Keratin, type I (IPR002957)

Homologous superfamilies none

Domains and repeats

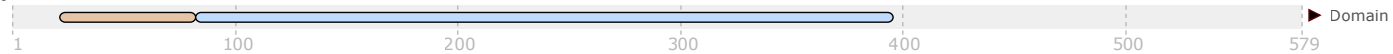

Detailed signature matches

- IPR027692 Neurofilament light polypeptide PTHR45652:SF8 (NEUR...)
- IPR002957 Keratin, type I PR01248 (TYPE1KERATIN)
- IPR006821 Intermediate filament head, DNA-binding domain PF04732 (Filament\_head)
- IPR39008 Intermediate filament, rod domain PF00038 (Filament)  
SM01391 (Filament\_2)  
PS51842 (IF\_ROD\_2)
- IPR018039 Intermediate filament protein, conserved site PS00226 (IF\_ROD\_1)
- no IPR Unintegrated signatures G3DSA:1.20.5....  
G3DSA:1.20.5.170  
G3DSA:1.20.5.500  
PTHR45652 (FAMILY N...)  
SSF64593 (Intermedi...)

Other features

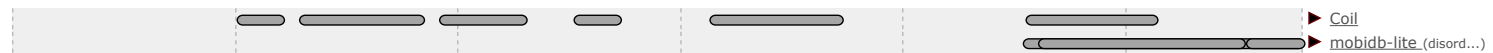

GO Term prediction

- | Biological process          | Molecular function                      | Cellular component               |
|-----------------------------|-----------------------------------------|----------------------------------|
| GO:0061564 axon development | GO:0005198 structural molecule activity | GO:0005882 intermediate filament |
|                             |                                         | GO:0005883 neurofilament         |

Protein

(other I.F.) si:dkey-27m7.4

Length 375 amino acids

Protein family membership

 [Keratin, type I \(IPR002957\)](#)

Homologous superfamilies none

Domains and repeats

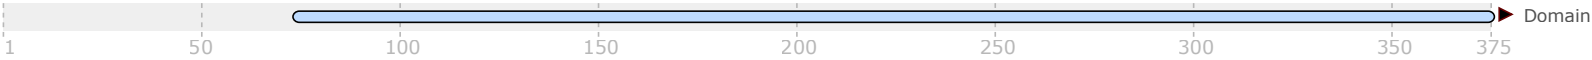

Detailed signature matches

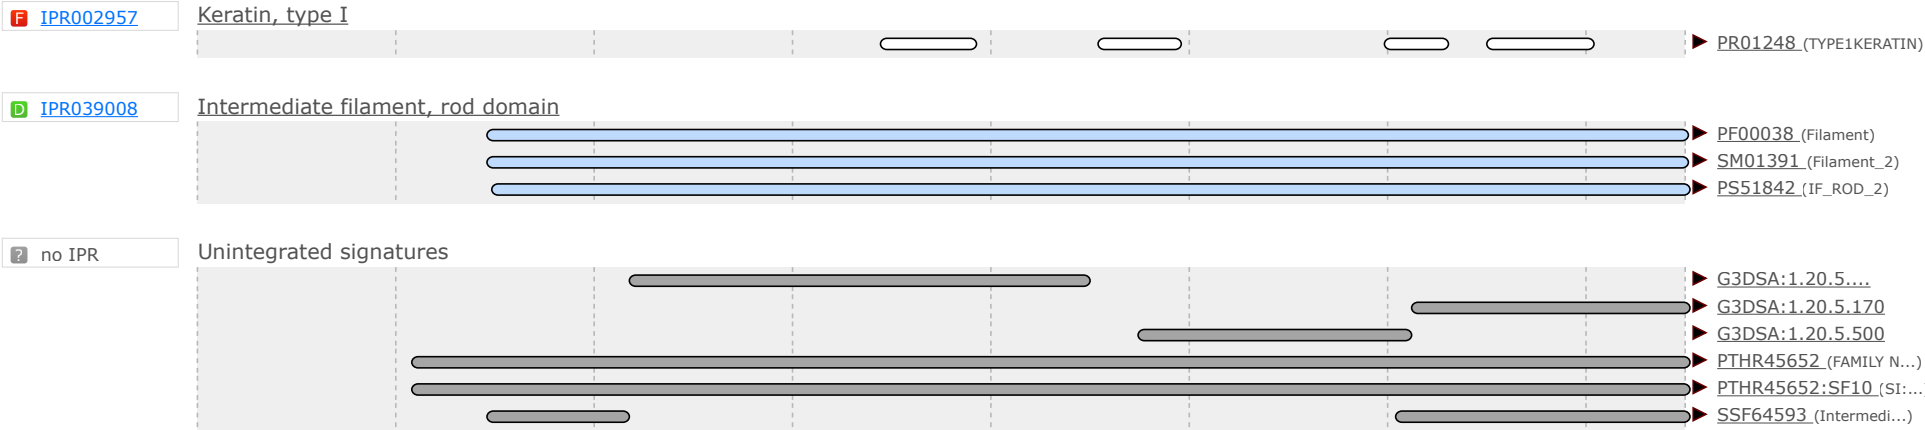

Other features

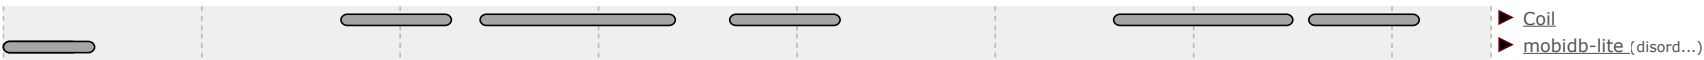

GO Term prediction

| Biological process | Molecular function                                      | Cellular component |
|--------------------|---------------------------------------------------------|--------------------|
| None predicted.    | <a href="#">GO:0005198</a> structural molecule activity | None predicted.    |

(other I.F.) nefma

Length 849 amino acids

Protein family membership

- Neurofilament medium polypeptide (IPR027697)
- Keratin, type I (IPR002957)

Homologous superfamilies none

Domains and repeats

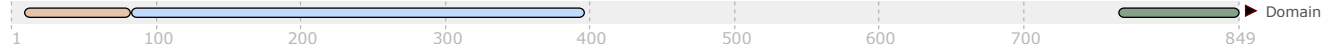

Detailed signature matches

IPR027697

Neurofilament medium polypeptide

PTHR45652:SF3 (NEUR...)

IPR002957

Keratin, type I

PR01248 (TYPE1KERATIN)

IPR006821

Intermediate filament head, DNA-binding domain

PF04732 (Filament\_head)

IPR039008

Intermediate filament, rod domain

PF00038 (Filament)

SM01391 (Filament\_2)

PS51842 (IF\_ROD\_2)

IPR011098

G5 domain

PS51109 (G5)

IPR018039

Intermediate filament protein, conserved site

PS00226 (IF\_ROD\_1)

no IPR

Unintegrated signatures

G3DSA:1.20.5...

G3DSA:1.20.5.170

G3DSA:1.20.5.500

PTHR45652 (FAMILY N...)

SSF64593 (Intermedi...)

Other features

Coil

mobidb-lite(disord...)

GO Term prediction

**Biological process**  
[GO:0033693](#) neurofilament bundle assembly

**Molecular function**  
[GO:0005198](#) structural molecule activity

**Cellular component**  
[GO:0005882](#) intermediate filament  
[GO:0005883](#) neurofilament

(other I.F.) nefmb

Length 717 amino acids

Protein family membership

- Neurofilament medium polypeptide (IPR027697)
- Keratin, type I (IPR002957)

Homologous superfamilies none

Domains and repeats

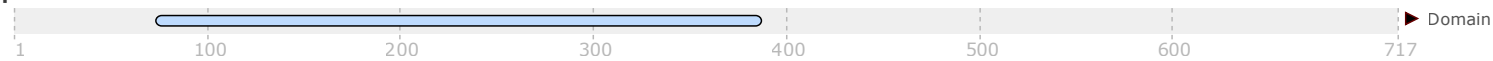

Detailed signature matches

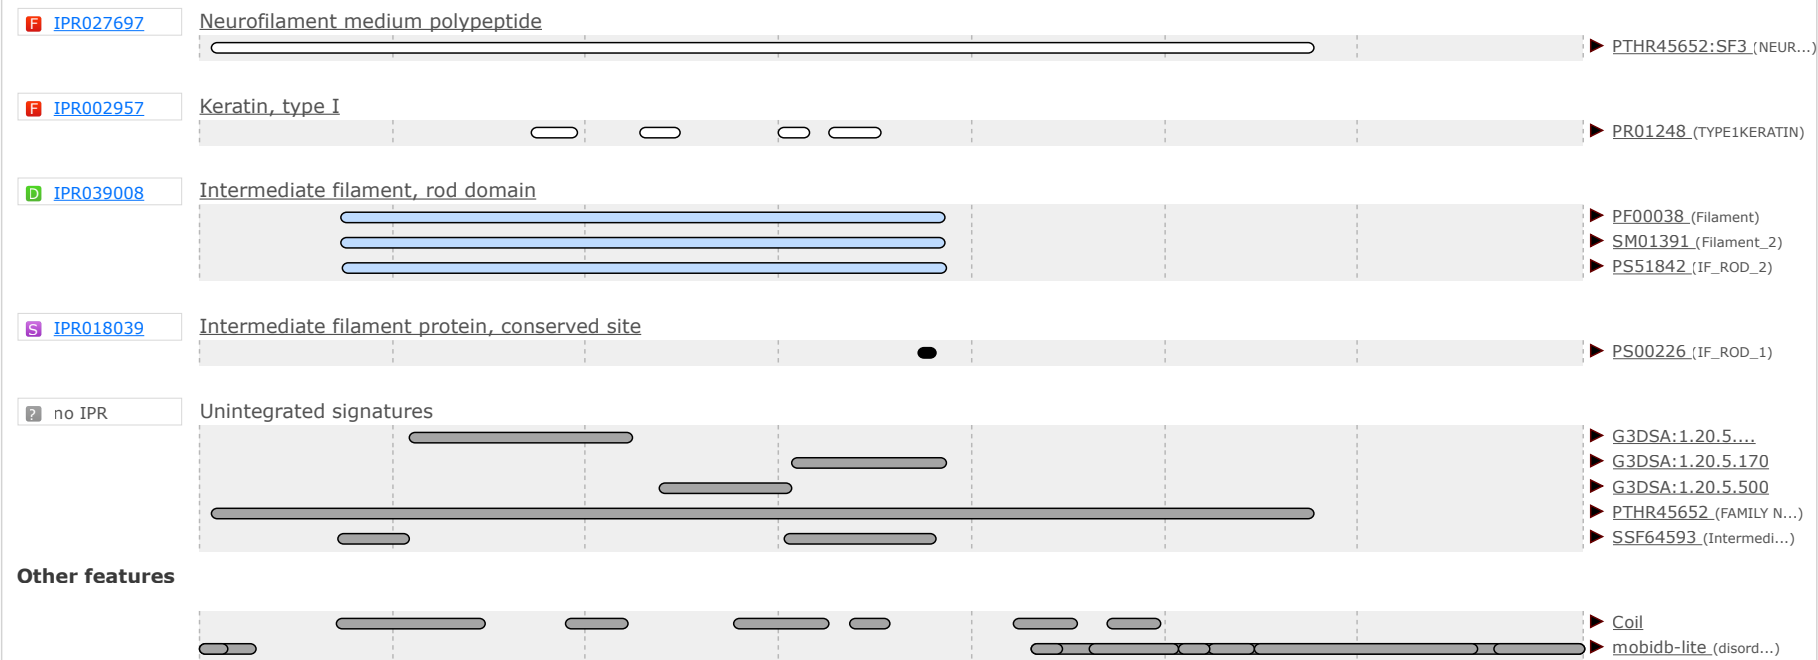

GO Term prediction

| Biological process                                       | Molecular function                                      | Cellular component                       |
|----------------------------------------------------------|---------------------------------------------------------|------------------------------------------|
| <a href="#">GO:0033693</a> neurofilament bundle assembly | <a href="#">GO:0005198</a> structural molecule activity | <a href="#">GO:0005883</a> neurofilament |

Protein

(T.K.A.) thread keratin alpha

Length 589 amino acids

Protein family membership None predicted.

Homologous superfamilies none

Domains and repeats

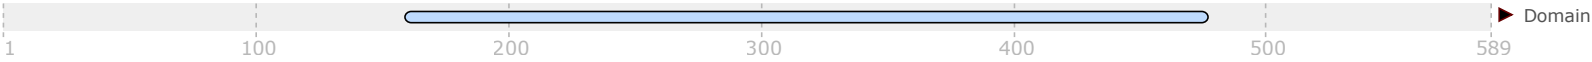

Detailed signature matches

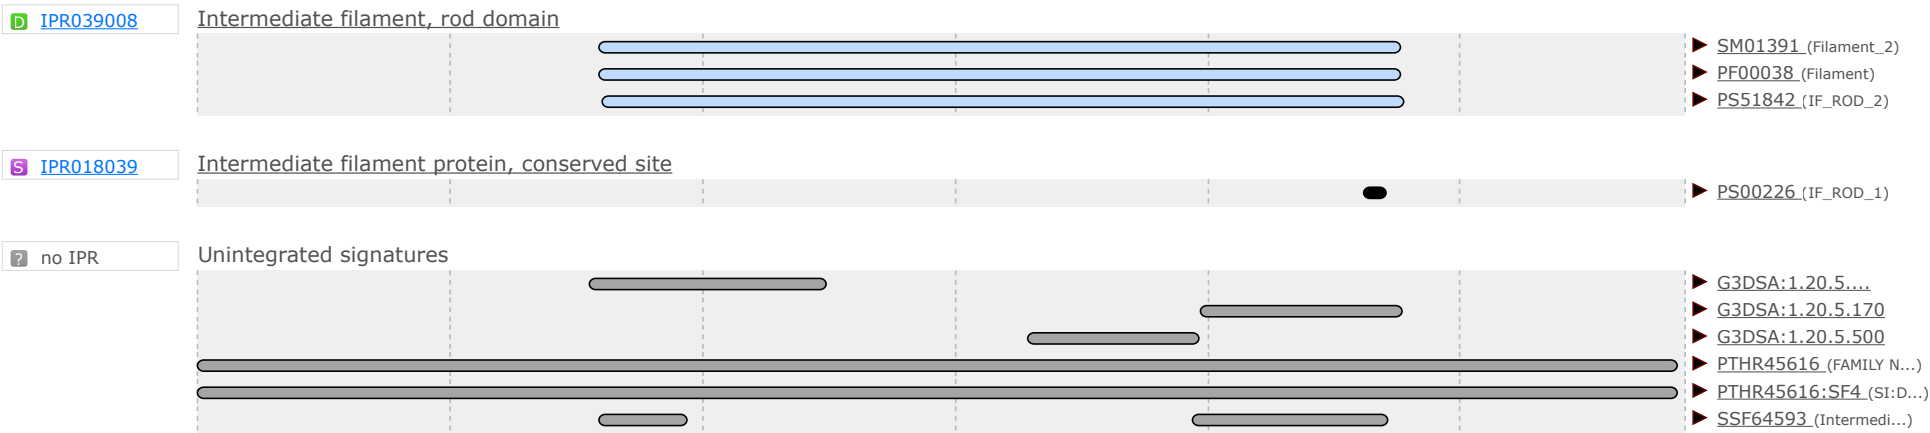

Other features

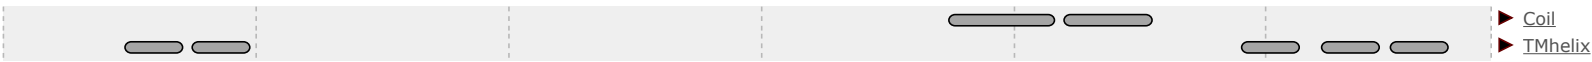

GO Term prediction

| Biological process | Molecular function | Cellular component |
|--------------------|--------------------|--------------------|
| None predicted.    | None predicted.    | None predicted.    |

Protein

(T.K.G.) thread keratin gamma

Length 476 amino acids

Protein family membership None predicted.

Homologous superfamilies none

Domains and repeats

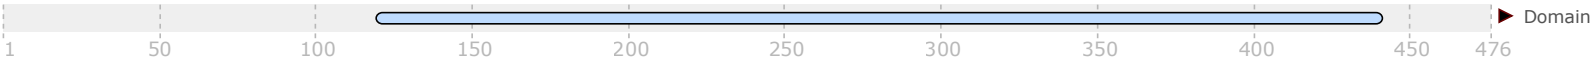

Detailed signature matches

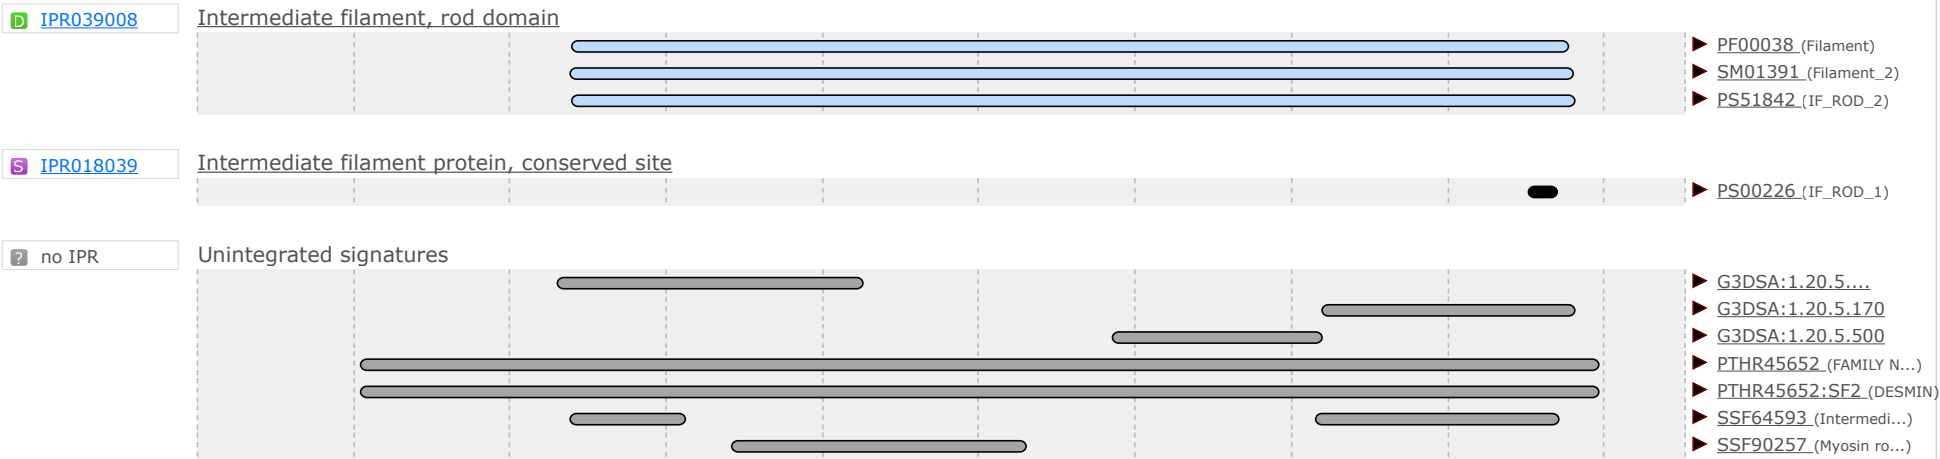

Other features

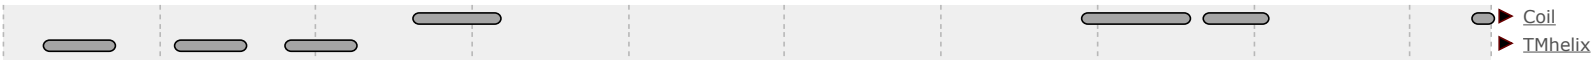

GO Term prediction

| Biological process | Molecular function | Cellular component |
|--------------------|--------------------|--------------------|
| None predicted.    | None predicted.    | None predicted.    |

(krt222) krt222

Length 428 amino acids

Protein family membership

 [Keratin, type I \(IPR002957\)](#)

Homologous superfamilies none

Domains and repeats

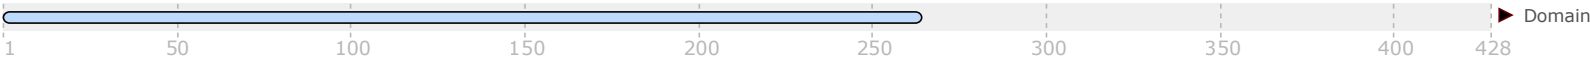

Detailed signature matches

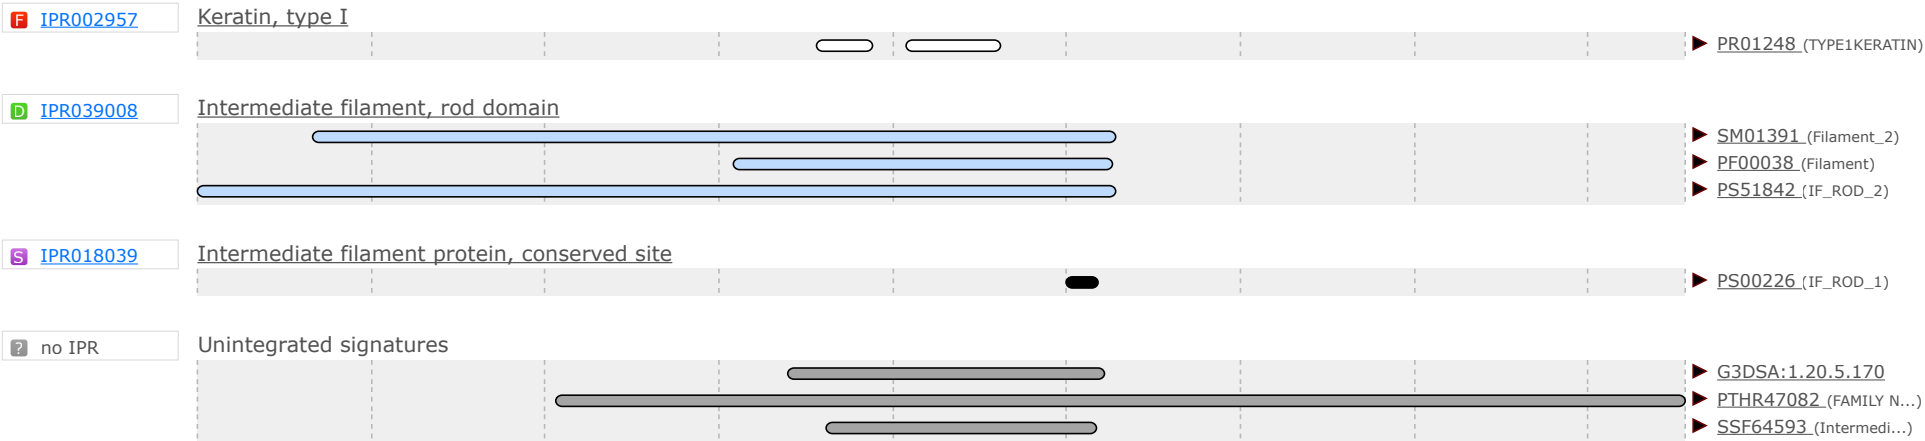

Other features

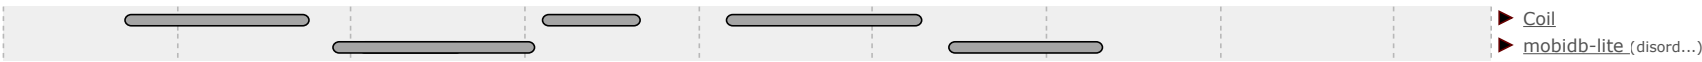

GO Term prediction

| Biological process | Molecular function                                      | Cellular component |
|--------------------|---------------------------------------------------------|--------------------|
| None predicted.    | <a href="#">GO:0005198</a> structural molecule activity | None predicted.    |
