# Supplementary material
Source: publisher figshare collection journal article supplement (https://gsajournals.figshare.com/articles/dataset/_/8266763)
Supplement: Supplementary file 6 [file 1]

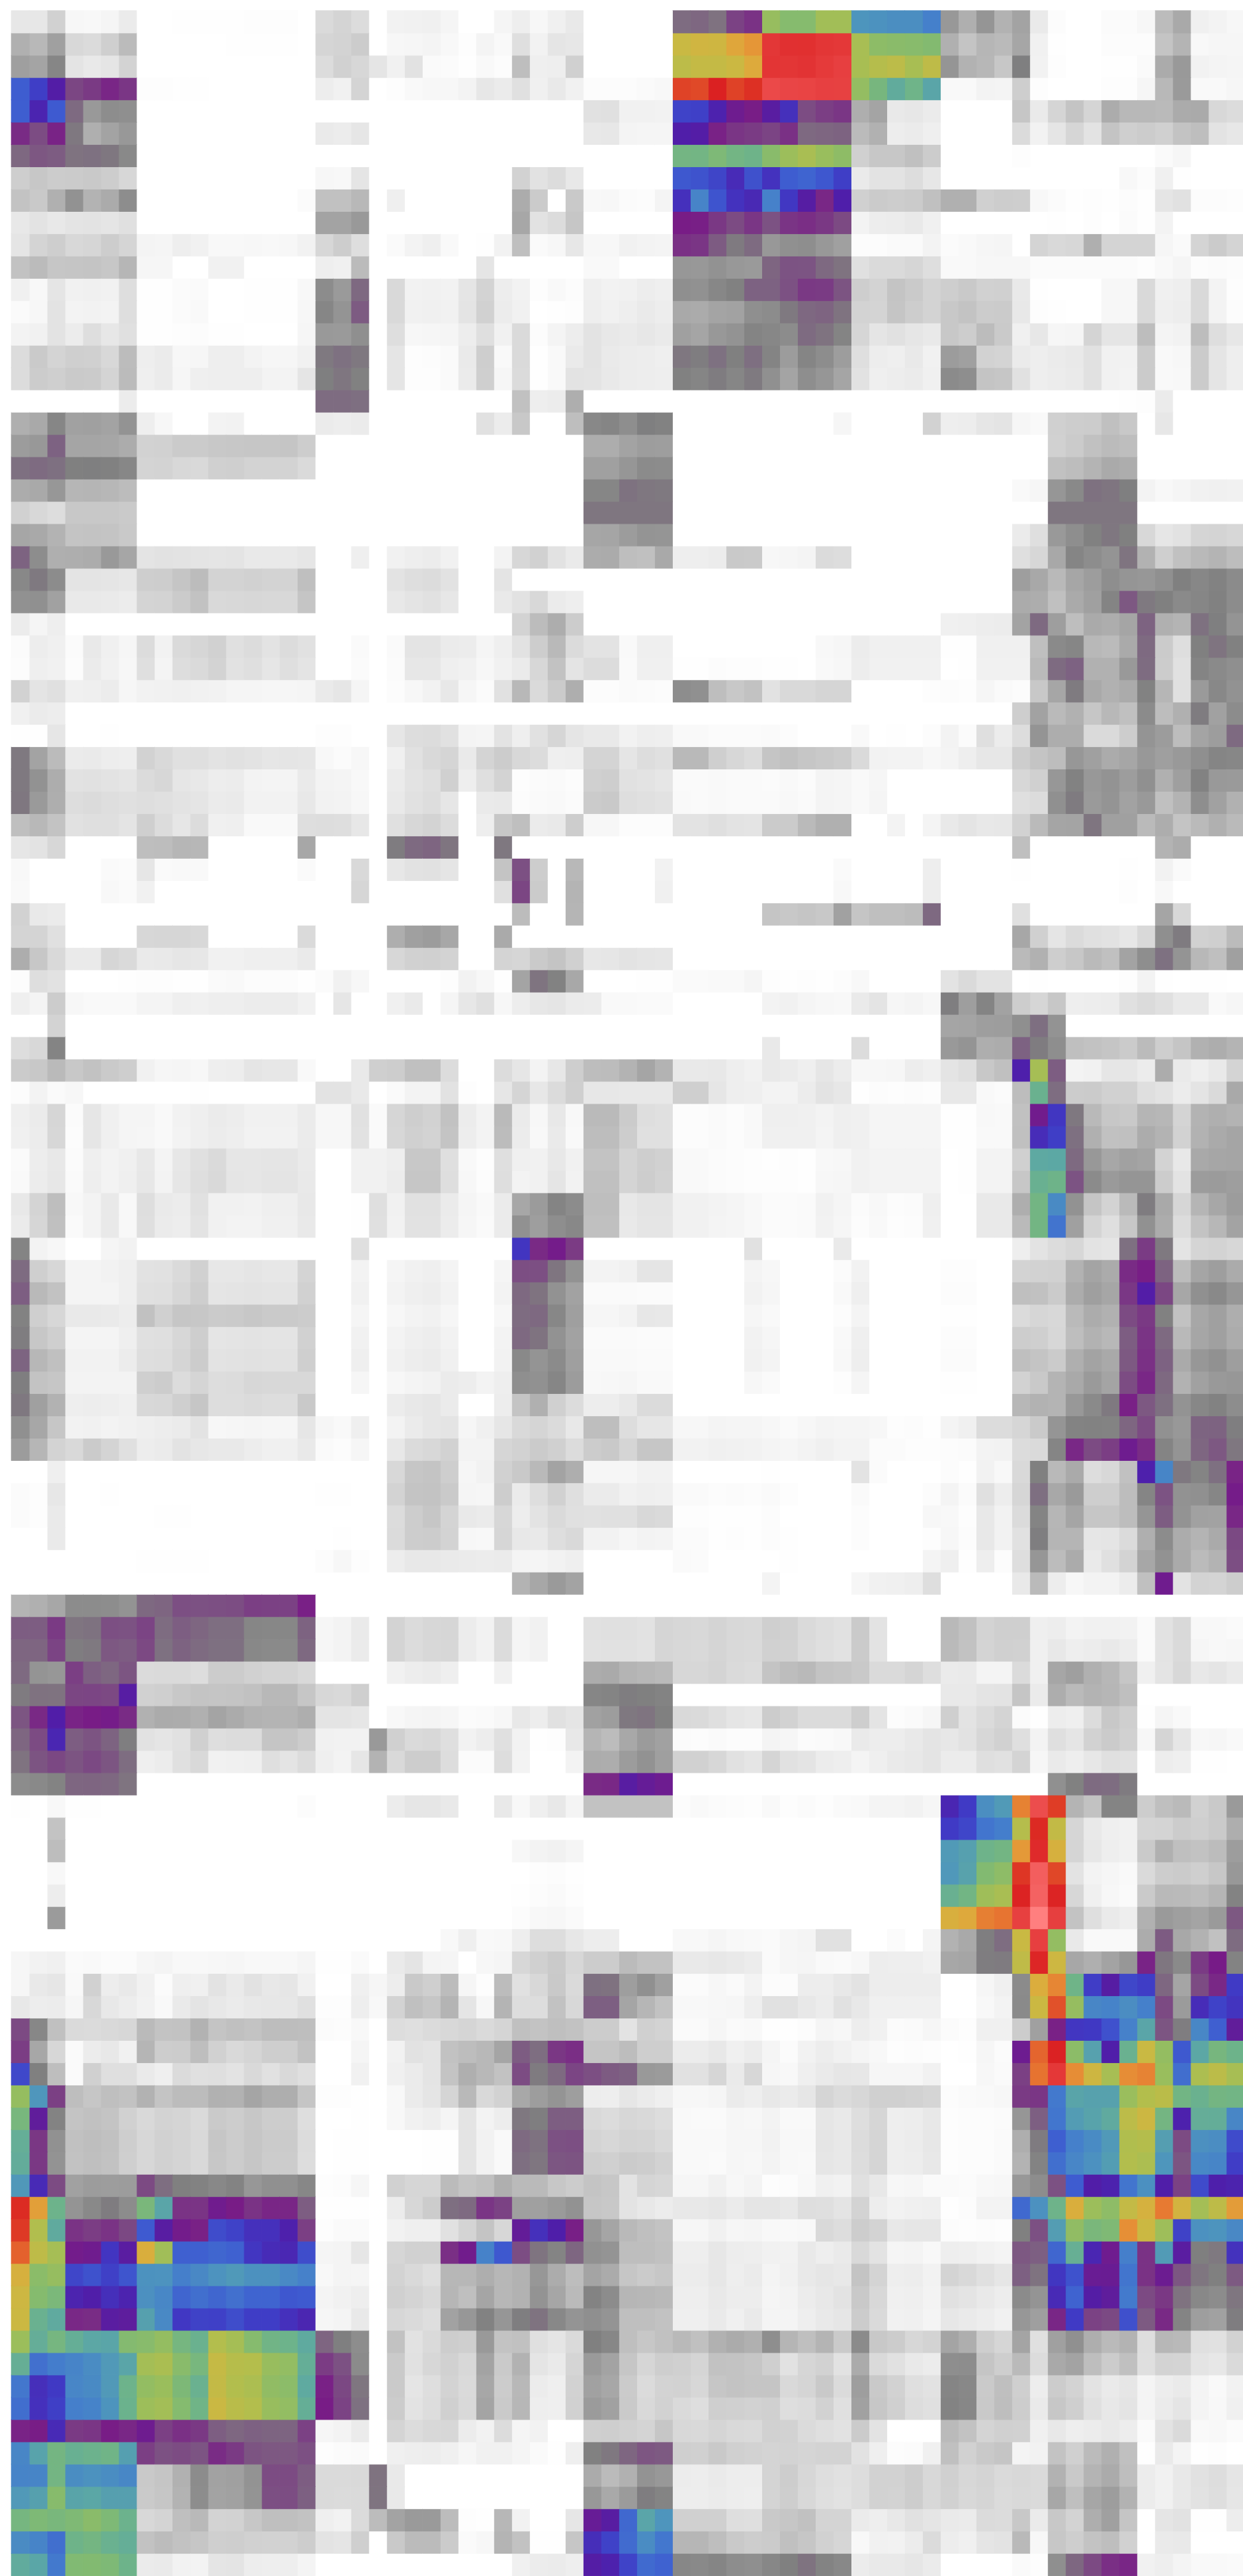

GO:0005615: extracellular space  
GO:0044421: extracellular region part  
GO:0005576: extracellular region  
GO:0031012: extracellular matrix  
GO:0005604: basement membrane  
GO:0062023: collagen-containing extracellular matrix  
GO:0008305: integrin complex  
GO:0098802: plasma membrane receptor complex  
GO:0005581: collagen trimer  
GO:0043235: receptor complex  
GO:0098797: plasma membrane protein complex  
GO:0031252: cell leading edge  
GO:0031226: intrinsic component of plasma membrane  
GO:0005887: integral component of plasma membrane  
GO:0044459: plasma membrane part  
GO:0005886: plasma membrane  
GO:0071944: cell periphery  
GO:1902711: GABA-A receptor complex  
GO:0005884: actin filament  
GO:0005902: microvillus  
GO:0032588: trans-Golgi network membrane  
GO:0016342: catenin complex  
GO:0043293: apoptosome  
GO:0033256: I-kappaB/NF-kappaB complex  
GO:0030173: integral component of Golgi membrane  
GO:0030127: COPII vesicle coat  
GO:0012507: ER to Golgi transport vesicle membrane  
GO:0005844: polysome  
GO:0043231: intracellular membrane-bounded organelle  
GO:0043227: membrane-bounded organelle  
GO:0098796: membrane protein complex  
GO:0033179: proton-transporting V-type ATPase, V0 domain  
GO:0031966: mitochondrial membrane  
GO:0031982: vesicle  
GO:0044440: endosomal part  
GO:0010008: endosome membrane  
GO:0005834: heterotrimeric G-protein complex  
GO:0008537: proteasome activator complex  
GO:0097730: non-motile cilium  
GO:0001750: photoreceptor outer segment  
GO:0001725: stress fiber  
GO:0005788: endoplasmic reticulum lumen  
GO:0005758: mitochondrial intermembrane space  
GO:0000786: nucleosome  
GO:0016324: apical plasma membrane  
GO:0098556: cytoplasmic side of rough endoplasmic reticulum membrane  
GO:0031526: brush border membrane  
GO:0043232: intracellular non-membrane-bounded organelle  
GO:0032991: protein-containing complex  
GO:0044464: cell part  
GO:0005623: cell  
GO:0043226: organelle  
GO:0043229: intracellular organelle  
GO:0044446: intracellular organelle part  
GO:0044422: organelle part  
GO:0030126: COPI vesicle coat  
GO:0005798: Golgi-associated vesicle  
GO:0030662: coated vesicle membrane  
GO:0030135: coated vesicle  
GO:0030660: Golgi-associated vesicle membrane  
GO:0030120: vesicle coat  
GO:0030117: membrane coat  
GO:0030134: COPII-coated ER to Golgi transport vesicle  
GO:0044433: cytoplasmic vesicle part  
GO:0098805: whole membrane  
GO:0005739: mitochondrion  
GO:0005740: mitochondrial envelope  
GO:0031967: organelle envelope  
GO:0044429: mitochondrial part  
GO:0044455: mitochondrial membrane part  
GO:0005730: nucleolus  
GO:0030428: cell septum  
GO:0005923: bicellular tight junction  
GO:0043296: apical junction complex  
GO:0045121: membrane raft  
GO:0045095: keratin filament  
GO:0030054: cell junction  
GO:0099513: polymeric cytoskeletal fiber  
GO:0044430: cytoskeletal part  
GO:0030057: desmosome  
GO:0044445: cytosolic part  
GO:0022627: cytosolic small ribosomal subunit  
GO:0022625: cytosolic large ribosomal subunit  
GO:0005840: ribosome  
GO:0044391: ribosomal subunit  
GO:0022626: cytosolic ribosome  
GO:1990904: ribonucleoprotein complex  
GO:0005829: cytosol  
GO:0044424: intracellular part  
GO:0005622: intracellular  
GO:0031090: organelle membrane  
GO:0044444: cytoplasmic part  
GO:0005737: cytoplasm  
GO:0005783: endoplasmic reticulum  
GO:0044432: endoplasmic reticulum part  
GO:0005789: endoplasmic reticulum membrane  
GO:0042175: nuclear outer membrane-endoplasmic reticulum membrane network  
GO:0098588: bounding membrane of organelle  
GO:0012505: endomembrane system  
GO:0031984: organelle subcompartment  
GO:0005794: Golgi apparatus  
GO:0000139: Golgi membrane  
GO:0098791: Golgi subcompartment  
GO:0044431: Golgi apparatus part  
GO:0016020: membrane  
GO:0044425: membrane part  
GO:0031224: intrinsic component of membrane  
GO:0016021: integral component of membrane  
GO:0070160: tight junction  
GO:0005911: cell-cell junction  
GO:0005882: intermediate filament  
GO:0045111: intermediate filament cytoskeleton  
GO:0005856: cytoskeleton  
GO:0015629: actin cytoskeleton  
GO:0005885: Arp2/3 protein complex
